# Supplementary material
Source: PubMed Central journal article supplement (PMC9661715)
Supplement: ml2c00237_si_001.pdf [file ml2c00237_si_001.pdf]

## **Discovery of KOR selective D-tetrapeptides with improved *in vivo* antinociceptive effect after peripheral administration**

Azzurra Stefanucci,<sup>1,\*</sup> Alice Della Valle,<sup>1</sup> Giuseppe Scioli,<sup>1</sup> Lorenza Marinaccio,<sup>1</sup> Stefano Pieretti,<sup>2</sup> Paola Minosi,<sup>2</sup> Edina Szucs,<sup>3</sup> Sandor Benyhe,<sup>3</sup> Domiziana Masci,<sup>4</sup> Parthasaradhireddy Tanguturi,<sup>5</sup> Kerry Chou,<sup>5</sup> Deborah Barlow,<sup>6</sup> Karen Houseknecht,<sup>6</sup> John M. Streicher,<sup>6</sup> Adriano Mollica<sup>1</sup>

<sup>1</sup> Dipartimento di Farmacia, Università di Chieti-Pescara “G. d’Annunzio”, Via dei Vestini 31, 66100 Chieti, Italy.

<sup>2</sup> Istituto Superiore di Sanità, Centro Nazionale Ricerca e Valutazione Preclinica e Clinica dei farmaci, Viale Regina Elena 299, 00161 Rome, Italy.

<sup>3</sup> Institute of Biochemistry, Biological Research Centre, Szeged, Hungary.

<sup>4</sup> Department of Basic Biotechnological Sciences, Intensivological and Perioperative Clinics, Catholic University of Sacred Heart, Largo Francesco Vito 1, 00168 Rome, Italy.

<sup>5</sup> Department of Pharmacology, College of Medicine, University of Arizona, Tucson, AZ, USA.

<sup>6</sup> Department of Biomedical Sciences, College of Osteopathic Medicine, University of New England, Biddeford, ME, USA.

\*a.stefanucci@unich.it

| <b>TABLE OF CONTENTS</b>                             | <b>Pages</b> |
|------------------------------------------------------|--------------|
| Experimental procedures                              | 2-6          |
| <i>In vitro</i> binding affinity and GTP stimulation | 7-9          |
| <i>In vivo</i> assays                                | 10,11        |
| RP-HPLC traces                                       | 12-13        |
| LRMS spectra                                         | 14-27        |
| <i>In vivo</i> pharmacokinetic assessment            | 28-32        |

## Experimental procedures

### Chemistry

#### *Materials and Methods*

All reagents, Fmoc-protected amino acids and solvents were purchased from VWR (MI, Italy), Merck (MI, Italy) and GLS Shanghai (China). All the C-terminal amides obtained as TFA salts were triturated in diethyl ether and purified on C18 prep RP-HPLC recorded at 213, 254, and 275 nm (Waters XBridge™ Prep BEH C18, 130 Å, 5.0 μm, i.d. 19 mm × 250 mm length, 19 mm × 10 mm column) at a flow rate of 7 mL/min; eluent: H<sub>2</sub>O/ACN-0.1% TFA from 5% ACN to 90% ACN in 32 min. The purity of each final product was assessed by C18 analytical RP-HPLC recorded at 213, 254, and 275 nm (Waters C18 4.6 mm × 150 mm) at a flow rate of 1 mL/min; eluent: H<sub>2</sub>O/ACN-0.1% TFA from 5% ACN to 90% ACN in 30 minutes. <sup>1</sup>H-NMR spectra were recorded at 25°C on a 300 MHz Varian Oxford spectrometer, DMSO-d<sub>6</sub> as solvent (chemical shifts in parts per million (δ) downfield from the internal standard TMS). LRMS was performed on a LCQ Finnigan-Mat mass spectrometer (San Jose, CA) by ESI-spray source and ion trap analyzer, capillary temperature at 200°C, the spray voltage at 4.00 kV. Nitrogen (N<sub>2</sub>) and helium were used as sheath gas and auxiliary gas. All the final products show a purity ≥ 90% as detected by analytical RP-HPLC (see SI).

#### *Solid phase peptide synthesis procedure*

The novel C-terminal amides were prepared using Fmoc protection strategy via solid phase peptide synthesis, on Rink amide resin (loading coefficient 1.2 mMol/g). The following protected amino acids were used: *tert*-butyloxy-carbonyl (Boc) for D-tryptophan, *O*-*tert*-butyl (*O*-*tert*-Bu) for D-tyrosine, 2,2,4,6,7-pentamethyldihydrobenzofuran-5-sulfonyl (Pbf) for D-arginine side chain. Repeated steps of coupling reactions and Fmoc-removal were done following the procedure previously described by us. The novel tetrapeptides have been obtained as TFA salts following a strong cleavage treatment of the resin with TFA/DCM= 9:1 for 1h at r.t.

H-(D)Phe-(D)Phe-(D)Nle-(D)Arg-NH<sub>2</sub>: 64% overall yield; rt (RP-HPLC anal.): 15.20 min. <sup>1</sup>H-NMR (DMSO-d<sub>6</sub>), δ: 8.04 (d, 1H, NH (D)Phe<sup>2</sup>), 7.35-7.13 (m, 16H, NH<sub>2</sub> C-terminal amide + NH (D)Arg + NH (D)Nle + 2\*NH (D)Arg + 10H aromatics), 4.56 (q, 1H, CH<sup>α</sup> (D)Phe<sup>1</sup>), 4.17 (m, 2H, CH<sup>α</sup> (D)Nle, (D)Arg), 3.88 (q, 1H, CH<sup>α</sup> (D)Phe<sup>2</sup>), 3.06 (m, 4H, 2\*CH<sub>2</sub><sup>β</sup> (D)Phe<sup>1,2</sup>), 2.85 (m, 2H, CH<sub>2</sub><sup>β</sup> (D)Nle), 1.61-1.26 (m, 10H, 2\*CH<sub>2</sub><sup>γ,δ</sup> (D)Nle and

3\*CH<sub>2</sub><sup>β,γ,δ</sup> (D)Arg), 0.84 (d, 3H, CH<sub>3</sub> (D)Nle). LRMS C<sub>30</sub>H<sub>44</sub>N<sub>8</sub>O<sub>4</sub> without TFA, m/z: 580.3, found: 603.2 [M+Na]<sup>+</sup>

H-(D)-pF-Phe-(D)Phe-(D)Nle-(D)Arg-NH<sub>2</sub> (**1**): 82% overall yield; rt (RP-HPLC anal.): 15.37 min. <sup>1</sup>H-NMR (DMSO-d<sub>6</sub>), δ: 8.13 (t, 1H, NH (D)Phe), 7.26-7.01 (m, 15H, NH<sub>2</sub> C-terminal amide + NH (D)Arg + NH (D)Nle + 2\*NH guanidinium + 9H aromatics), 4.49 (q, 1H, CH<sup>α</sup> (D)-pF-Phe), 4.11 (m, 2H, CH<sup>α</sup> (D)Nle, (D)Arg), 3.78 (q, 1H, CH<sup>α</sup> (D)Phe), 3.10-2.74 (m, 8H, 4\*CH<sub>2</sub><sup>β</sup> (D)Phe, (D)-pF-Phe, (D)Nle, (D)Arg), 1.64-1.25 (m, 10H, 2\*CH<sub>2</sub><sup>γ,δ</sup> (D)Nle and 3\*CH<sub>2</sub><sup>β,γ,δ</sup> (D)Arg), 0.84 (d, 3H, CH<sub>3</sub> (D)Nle). LRMS C<sub>30</sub>H<sub>43</sub>FN<sub>8</sub>O<sub>4</sub> without TFA, m/z: 598.3, found: 599.3 [M+H]<sup>+</sup>

H-(D)-mF-Phe-(D)Phe-(D)Nle-(D)Arg-NH<sub>2</sub> (**2**): 98% overall yield; rt (RP-HPLC anal.): 15.53 min. <sup>1</sup>H-NMR (DMSO-d<sub>6</sub>), δ: 8.74 (d, 1H, NH (D)Phe), 8.39 (d, 1H, NH (D)Nle), 8.01 (bs, 3H, NH<sub>3</sub><sup>+</sup> (D)-mF-Phe), 7.91 (d, 1H, NH (D)Arg), 7.48 (t, 1H, NH guanidinium), 7.38-7.05 (m, 11H, NH<sub>2</sub> C-terminal amide + 9H aromatics), 4.65 (q, 1H, CH<sup>α</sup> (D)-mF-Phe), 4.34 - 4.16 (m, 2H, CH<sup>α</sup> (D)Nle + (D)Arg), 3.98 (q, 1H, CH<sup>α</sup> (D)Phe), 3.11-2.70 (m, 8H, 4\*CH<sub>2</sub><sup>β</sup> (D)Phe, (D)-mF-Phe, (D)Nle, (D)Arg), 1.76-1.20 (m, 10H, 2\*CH<sub>2</sub><sup>γ,δ</sup> (D)Nle and 3\*CH<sub>2</sub><sup>β,γ,δ</sup> (D)Arg), 0.84 (d, 3H, CH<sub>3</sub> (D)Nle). LRMS C<sub>30</sub>H<sub>43</sub>FN<sub>8</sub>O<sub>4</sub> without TFA, m/z: 598.3, found: 599.4 [M+H]<sup>+</sup>

H-(D)-oF-Phe-(D)Phe-(D)Nle-(D)Arg-NH<sub>2</sub> (**3**): 35% overall yield; rt (RP-HPLC anal.): 15.16 min. <sup>1</sup>H-NMR (DMSO-d<sub>6</sub>), δ: 8.74 (d, 1H, NH (D)Phe), 8.33 (d, 1H, NH (D)Nle), 8.11 (bs, 3H, NH<sub>3</sub><sup>+</sup> (D)-oF-Phe), 7.89 (d, 1H, NH (D)Arg), 7.50 (t, 1H, NH guanidinium), 7.36-7.06 (m, 11H, NH<sub>2</sub> C-terminal amide + 9H aromatics), 4.63 (q, 1H, CH<sup>α</sup> (D)-oF-Phe), 4.26-4.13 (m, 2H, CH<sup>α</sup> (D)Nle, (D)Arg), 4.02 (q, 1H, CH<sup>α</sup> (D)Phe), 3.10-2.70 (m, 8H, 4\*CH<sub>2</sub><sup>β</sup> (D)Phe, (D)-oF-Phe, (D)Nle, (D)Arg), 1.63-1.25 (m, 10H, 2\*CH<sub>2</sub><sup>γ,δ</sup> (D)Nle and 3\*CH<sub>2</sub><sup>β,γ,δ</sup> (D)Arg), 0.84 (d, 3H, CH<sub>3</sub> (D)Nle). LRMS C<sub>30</sub>H<sub>43</sub>FN<sub>8</sub>O<sub>4</sub> without TFA, m/z: 598.3, found: 599.4 [M+H]<sup>+</sup>

H-(D)Tic-(D)Phe-(D)Nle-(D)Arg-NH<sub>2</sub> (**4**): 48% overall yield; rt (RP-HPLC anal.): 15.46 min. <sup>1</sup>H-NMR (DMSO-d<sub>6</sub>), δ: 8.76 (d, 1H, NH (D)Phe), 8.51 (d, 1H, NH (D)Nle), 8.02 (d, 1H, NH (D)Arg), 7.75 (t, 1H, NH guanidinium), 7.32-7.11 (m, 13H, NH<sub>2</sub> C-terminal amide + 9H aromatics + NH<sub>2</sub> guanidinium), 4.62 (q, 1H, CH<sup>α</sup> (D)Tic), 4.20-02 (m, 2H, CH<sup>α</sup> (D)Nle + (D)Arg), 3.85 (q, 1H, CH<sup>α</sup> (D)Phe), 3.10-2.73 (m, 8H, CH<sub>2</sub><sup>β</sup> (D)Phe and 2\*CH<sub>2</sub> (D)Tic, CH<sub>2</sub><sup>β</sup>

(D)Nle), 1.72-1.25 (m, 10H, 2\*CH<sub>2</sub><sup>γ,δ</sup> (D)Nle and 3\*CH<sub>2</sub><sup>β,γ,δ</sup> (D)Arg), 0.85 (d, 3H, CH<sub>3</sub> (D)Nle). LRMS C<sub>31</sub>H<sub>44</sub>N<sub>8</sub>O<sub>4</sub> without TFA, m/z: 592.3, found: 592.8 [M]

H-(D)Trp-(D)Phe-(D)Nle-(D)Arg-NH<sub>2</sub> (**5**): 97% overall yield; rt (RP-HPLC anal.): 15.80 min. <sup>1</sup>H-NMR (DMSO-d<sub>6</sub>), δ: 11.01 (s, 1H, NH indole), 8.87 (d, 1H, NH (D)Phe), 8.34 (d, 1H, NH (D)Nle), 7.93-7.91 (m, 4H, NH<sub>3</sub><sup>+</sup> Trp and NH (D)Arg), 7.69 (d, 1H, H-indole), 7.49 (t, 1H, NH guanidinium), 7.35-6.95 (m, 13H, NH<sub>2</sub> C-terminal amide + 9H aromatics + NH<sub>2</sub> guanidinium), 4.67 (q, 1H, CH<sup>α</sup> (D)Trp), 4.30-4.14 (m, 2H, CH<sup>α</sup> (D)Nle, (D)Arg), 3.93 (q, 1H, CH<sup>α</sup> (D)Phe), 3.24-2.69 (m, 6H, CH<sub>2</sub><sup>β</sup> (D)Phe, CH<sub>2</sub><sup>β</sup> (D)Trp, CH<sub>2</sub><sup>β</sup> (D)Nle), 1.63-1.26 (m, 10H, 2\*CH<sub>2</sub><sup>γ,δ</sup> (D)Nle and 3\*CH<sub>2</sub><sup>β,γ,δ</sup> (D)Arg), 0.83 (d, 3H, CH<sub>3</sub> (D)Nle). LRMS C<sub>32</sub>H<sub>45</sub>N<sub>9</sub>O<sub>4</sub> without TFA, m/z: 619.3, found: 620.3 [M+H]<sup>+</sup>

H-(D)Tyr-(D)Phe-(D)Nle-(D)Arg-NH<sub>2</sub> (**6**): 31% overall yield; rt (RP-HPLC anal.): 14.90 min. <sup>1</sup>H-NMR (DMSO-d<sub>6</sub>), δ: 9.35 (s, 1H, OH Tyr), 8.72 (d, 1H, NH (D)Phe), 8.36 (d, 1H, NH (D)Nle), 7.92-7.89 (m, 4H, NH<sub>3</sub><sup>+</sup> and NH (D)Arg), 7.54 (t, 1H, NH guanidinium), 7.36-7.11 (m, 9H, NH<sub>2</sub> C-terminal amide + 5H aromatics + NH<sub>2</sub> guanidinium), 6.99 and 6.65 (dd, 4H, aromatics Tyr), 4.64 (q, 1H, CH<sup>α</sup> (D)Tyr), 4.25-4.16 (m, 2H, CH<sup>α</sup> (D)Nle, (D)Arg), 3.82 (q, 1H, CH<sup>α</sup> (D)Phe), 3.08-2.69 (m, 6H, CH<sub>2</sub><sup>β</sup> (D)Phe, CH<sub>2</sub><sup>β</sup> (D)Tyr, CH<sub>2</sub><sup>β</sup> (D)Nle), 1.63-1.25 (m, 10H, 2\*CH<sub>2</sub><sup>γ,δ</sup> (D)Nle and 3\*CH<sub>2</sub><sup>β,γ,δ</sup> (D)Arg), 0.84 (d, 3H, CH<sub>3</sub> (D)Nle). LRMS C<sub>30</sub>H<sub>44</sub>N<sub>8</sub>O<sub>5</sub> without TFA, m/z: 596.3, found: 597.4 [M+H]<sup>+</sup>

H-(D)Phe-(D)-*p*F-Phe-(D)Nle-(D)Arg-NH<sub>2</sub> (**7**): 37% overall yield; rt (RP-HPLC anal.): 15.39 min. <sup>1</sup>H-NMR (DMSO-d<sub>6</sub>), δ: 8.73 (d, 1H, NH (D)-*p*F-Phe), 8.34 (d, 1H, NH (D)Phe), 7.92 (d, 2H, NH (D)Nle, (D)Arg), 7.49 (t, 1H, NH guanydinium (D)Arg), 7.37-7.04 (m, 13H, NH<sub>2</sub> C-terminal amide + NH<sub>2</sub> (D)Arg + 9H aromatics), 4.63 (q, 1H, CH<sup>α</sup> (D)-*p*F-Phe), 4.25-4.09 (m, 2H, CH<sup>α</sup> (D)Nle, (D)Arg), 3.93 (q, 1H, CH<sup>α</sup> (D)Phe), 3.14-2.70 (m, 8H, 4\*CH<sub>2</sub><sup>β</sup> (D)Phe, (D)-*p*F-Phe, (D)Nle, (D)Arg), 1.63-1.24 (m, 10H, 2\*CH<sub>2</sub><sup>γ,δ</sup> (D)Nle and 3\*CH<sub>2</sub><sup>β,γ,δ</sup> (D)Arg), 0.83 (d, 3H, CH<sub>3</sub> (D)Nle). LRMS C<sub>30</sub>H<sub>43</sub>FN<sub>8</sub>O<sub>4</sub> without TFA, m/z: 598.3, found: 599.4 [M+H]<sup>+</sup>

H-(D)Phe-(D)-*m*F-Phe-(D)Nle-(D)Arg-NH<sub>2</sub> (**8**): 59% overall yield; rt (RP-HPLC anal.): 15.24 min. <sup>1</sup>H-NMR (DMSO-d<sub>6</sub>), δ: 8.75 (d, 1H, NH (D)Phe), 8.36 (d, 1H, NH (D)Nle), 7.95 (m, 4H, NH<sub>3</sub><sup>+</sup> (D)-*m*F-Phe and NH (D)Arg), 7.51 (t, 1H, NH guanidinium), 7.36-6.99 (m, 13H, NH<sub>2</sub> C-terminal amide + 9H aromatics + NH<sub>2</sub> guanydinium), 4.66 (q, 1H, CH<sup>α</sup> (D)-*m*F-Phe), 4.27-4.16 (m, 2H, CH<sup>α</sup> (D)Nle, (D)Arg), 3.96 (q, 1H, CH<sup>α</sup> (D)Phe), 3.06-2.70 (m, 8H,

4\*CH<sub>2</sub><sup>β</sup> (D)Phe, (D)-mF-Phe, (D)Nle, (D)Arg), 1.63-1.20 (m, 10H, 2\*CH<sub>2</sub><sup>γ,δ</sup> (D)Nle and 3\*CH<sub>2</sub><sup>β,γ,δ</sup> (D)Arg), 0.84 (d, 3H, CH<sub>3</sub> (D)Nle). LRMS C<sub>30</sub>H<sub>43</sub>FN<sub>8</sub>O<sub>4</sub> without TFA, m/z: 598.3, found: 300.3 [M/2]<sup>++</sup>

H-(D)Phe-(D)-oF-Phe-(D)Nle-(D)Arg-NH<sub>2</sub> (**9**): 96% overall yield; rt (RP-HPLC anal.): 15.40 min. <sup>1</sup>H-NMR (DMSO-d<sub>6</sub>), δ: 8.74 (d, 1H, NH (D)Phe), 8.33 (d, 1H, NH (D)Nle), 8.11 (bs, 3H, NH<sub>3</sub><sup>+</sup> (D)-oF-Phe), 7.89 (d, 1H, NH (D)Arg), 7.50 (t, 1H, NH guanidinium), 7.32-7.05 (m, 11H, NH<sub>2</sub> C-terminal amide + 9H aromatics), 4.66 (q, 1H, CH<sup>α</sup> (D)-oF-Phe), 4.20-4.12 (m, 2H, CH<sup>α</sup> (D)Nle, (D)Arg), 3.91 (q, 1H, CH<sup>α</sup> (D)Phe), 3.06-2.79 (m, 8H, 4\*CH<sub>2</sub><sup>β</sup> (D)Phe, (D)-oF-Phe, (D)Nle, (D)Arg), 1.60-1.23 (m, 10H, 2\*CH<sub>2</sub><sup>γ,δ</sup> (D)Nle and 3\*CH<sub>2</sub><sup>β,γ,δ</sup> (D)Arg), 0.81 (d, 3H, CH<sub>3</sub> (D)Nle). LRMS C<sub>30</sub>H<sub>43</sub>FN<sub>8</sub>O<sub>4</sub> without TFA, m/z: 598.3, found: 599.5 [M+H]<sup>+</sup>

H-(D)Phe-(D)Tyr-(D)Nle-(D)Arg-NH<sub>2</sub> (**10**): 17% overall yield; rt (RP-HPLC anal.): 14.92 min. <sup>1</sup>H-NMR (DMSO-d<sub>6</sub>), δ: 9.22 (s, 1H, OH Tyr), 8.72 (d, 1H, NH (D)Phe), 8.32 (d, 1H, NH (D)Nle), 7.89 (d, 1H, NH (D)Arg), 7.49 (t, 1H, NH guanidinium), 7.36-7.11 (m, 9H, NH<sub>2</sub> C-terminal amide + 5H aromatics + NH<sub>2</sub> guanidinium), 7.05 and 6.62 (dd, 4H, aromatics Tyr), 4.55 (q, 1H, CH<sup>α</sup> (D)Tyr), 4.27-4.16 (m, 2H, CH<sup>α</sup> (D)Nle, (D)Arg), 3.90 (q, 1H, CH<sup>α</sup> (D)Phe), 3.08-2.89 (m, 6H, CH<sub>2</sub><sup>β</sup> (D)Phe, CH<sub>2</sub><sup>β</sup> (D)Tyr, CH<sub>2</sub><sup>β</sup> (D)Nle), 1.63-1.24 (m, 10H, 2\*CH<sub>2</sub><sup>γ,δ</sup> (D)Nle and 3\*CH<sub>2</sub><sup>β,γ,δ</sup> (D)Arg), 0.83 (d, 3H, CH<sub>3</sub> (D)Nle). LRMS C<sub>30</sub>H<sub>44</sub>N<sub>8</sub>O<sub>5</sub> without TFA, m/z: 596.3, found: 597.4 [M+H]<sup>+</sup>

H-(D)Phe-(D)Trp-(D)Nle-(D)Arg-NH<sub>2</sub> (**11**): 40% overall yield; rt (RP-HPLC anal.): 15.65 min. <sup>1</sup>H-NMR (DMSO-d<sub>6</sub>), δ: 10.82 (s, 1H, NH indole), 8.74 (d, 1H, NH (D)Phe), 8.38 (d, 1H, NH (D)Nle), 7.98-7.86 (m, 4H, NH<sub>3</sub><sup>+</sup> and NH (D)Arg), 7.68 (d, 1H, H-indole), 7.49 (t, 1H, NH guanidinium), 7.35-6.93 (m, 13H, NH<sub>2</sub> C-terminal amide + 9H aromatics + NH<sub>2</sub> guanidinium), 4.68 (q, 1H, CH<sup>α</sup> (D)Trp), 4.30-4.14 (m, 2H, CH<sup>α</sup> (D)Nle, (D)Arg), 3.94 (q, 1H, CH<sup>α</sup> (D)Phe), 3.16-2.84 (m, 6H, CH<sub>2</sub><sup>β</sup> (D)Phe, (D)Trp, (D)Nle), 1.64-1.20 (m, 10H, 2\*CH<sub>2</sub><sup>γ,δ</sup> (D)Nle and 3\*CH<sub>2</sub><sup>β,γ,δ</sup> (D)Arg), 0.83 (d, 3H, CH<sub>3</sub> (D)Nle). LRMS C<sub>32</sub>H<sub>45</sub>N<sub>9</sub>O<sub>4</sub> without TFA, m/z: 619.3, found: 620.3 [M+H]<sup>+</sup>

H-(D)Phe-(D)Tic-(D)Nle-(D)Arg-NH<sub>2</sub> (**12**): 61% overall yield; rt (RP-HPLC anal.): 16.37 min. <sup>1</sup>H-NMR (DMSO-d<sub>6</sub>), δ: 8.33 (d, 1H, NH (D)Phe), 8.10-8.05 (m, 3H, NH (D)Nle + NH<sub>2</sub><sup>+</sup> (D)Tic), 7.86 (d, 1H, NH (D)Arg), 7.56 (t, 1H, NH guanidinium), 7.39-7.11 (m, 13H, NH<sub>2</sub> C-terminal amide + 9H aromatics + NH<sub>2</sub> guanidinium), 4.84-4.76 (m, 2H, CH<sup>α</sup> (D)Tic,

(D)Nle), 4.20-4.06 (m, 2H, CH<sup>α</sup> (D)Arg, (D)Phe), 3.16-2.91 (m, 8H, CH<sub>2</sub><sup>β</sup> (D)Phe and 2\*CH<sub>2</sub> (D)Tic, CH<sub>2</sub><sup>β</sup> (D)Nle), 1.59-1.20 (m, 10H, 2\*CH<sub>2</sub><sup>γ,δ</sup> (D)Nle and 3\*CH<sub>2</sub><sup>β,γ,δ</sup> (D)Arg), 0.81 (d, 3H, CH<sub>3</sub> (D)Nle). LRMS C<sub>31</sub>H<sub>44</sub>N<sub>8</sub>O<sub>4</sub> without TFA, m/z: 592.3, found: 593.4 [M+H]<sup>+</sup>

## **Molecular Modelling**

### *Molecular Docking*

The docking of the novel molecule was done on the crystallized receptor-ligand complex KOR (6B73) obtained from the RCSB protein databank and submitted to a preparation by the Protein Preparation Wizard module present in Maestro 10.2. Several errors in the raw crystal structures have been amended such as the addition of the missing side chains, all the molecules belonging to the crystallization buffer were eliminated from the files, with the only exception for the crystallographic ligand; the protonation state was calculated at pH 7.4 and the hydrogens minimized by OPLS3 methods.

Following previously well-established protocol on these targets reported by us, the software Glide implemented in the Maestro 10.2 package was employed to perform the docking study. As a first step, the self-docking experiment was carried out to validate the docking procedure. Glide XP was used to perform the self-docking validation process. The docking cavity was defined as a cubic space of 20 Å side, centered at the crystallographic ligand, then Glide XP was employed in the *in silico* experiments for **7** and the parent compound FE200041.

## **In vitro assays**

### *Materials and Methods*

#### *Chemicals*

The radiolabelled GTP analogue [<sup>35</sup>S]GTPγS (specific activity: 1250 Ci/mmol) and the Ultima Gold™ MV harmless scintillation cocktail were acquired from PerkinElmer (Boston, USA).

#### *Opioid receptor binding and G-protein stimulation assays*

Opioid receptor radiolabelled competition assay and G-protein stimulation assay were executed on MOR, DOR and KOR, following the procedures previously described.<sup>1</sup>

#### *Data analysis*

Data analysis of GTPγS binding was performed with GraphPad Prism 5.0 software (GraphPad Prism Software Inc., San Diego, CA, USA).

1 Szűcs, E.; Büki, A.; Kékesi, G.; Horváth, G.; Benyhe, S. Mu-Opioid (MOP) receptor mediated G-protein signaling is impaired in specific brain regions in a rat model of schizophrenia. *Neurosci Lett.* **2016**, *21*, 29-33. doi: 10.1016/j.neulet.2016.02.060.

**Figure 1S.** MOR (A), DOR (B) and KOR (C) binding of *lead compound*, 1-12 ligands and reference compounds.

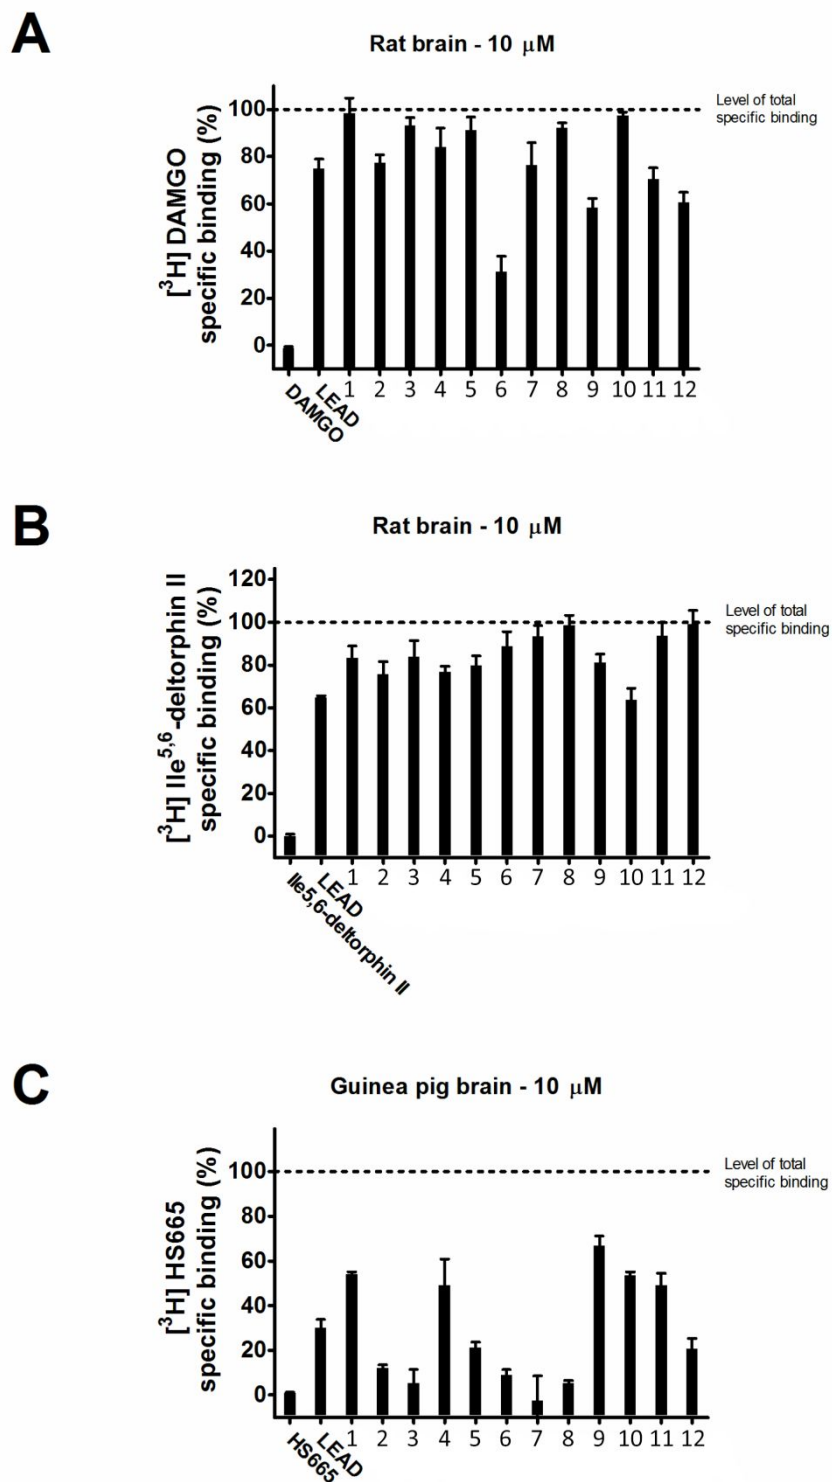



**Figure 2S.** Binding affinity of the best ligands 2,3,5,6 and 7,8,12 in KOR-opioid system against HS665 and the *lead compound*.

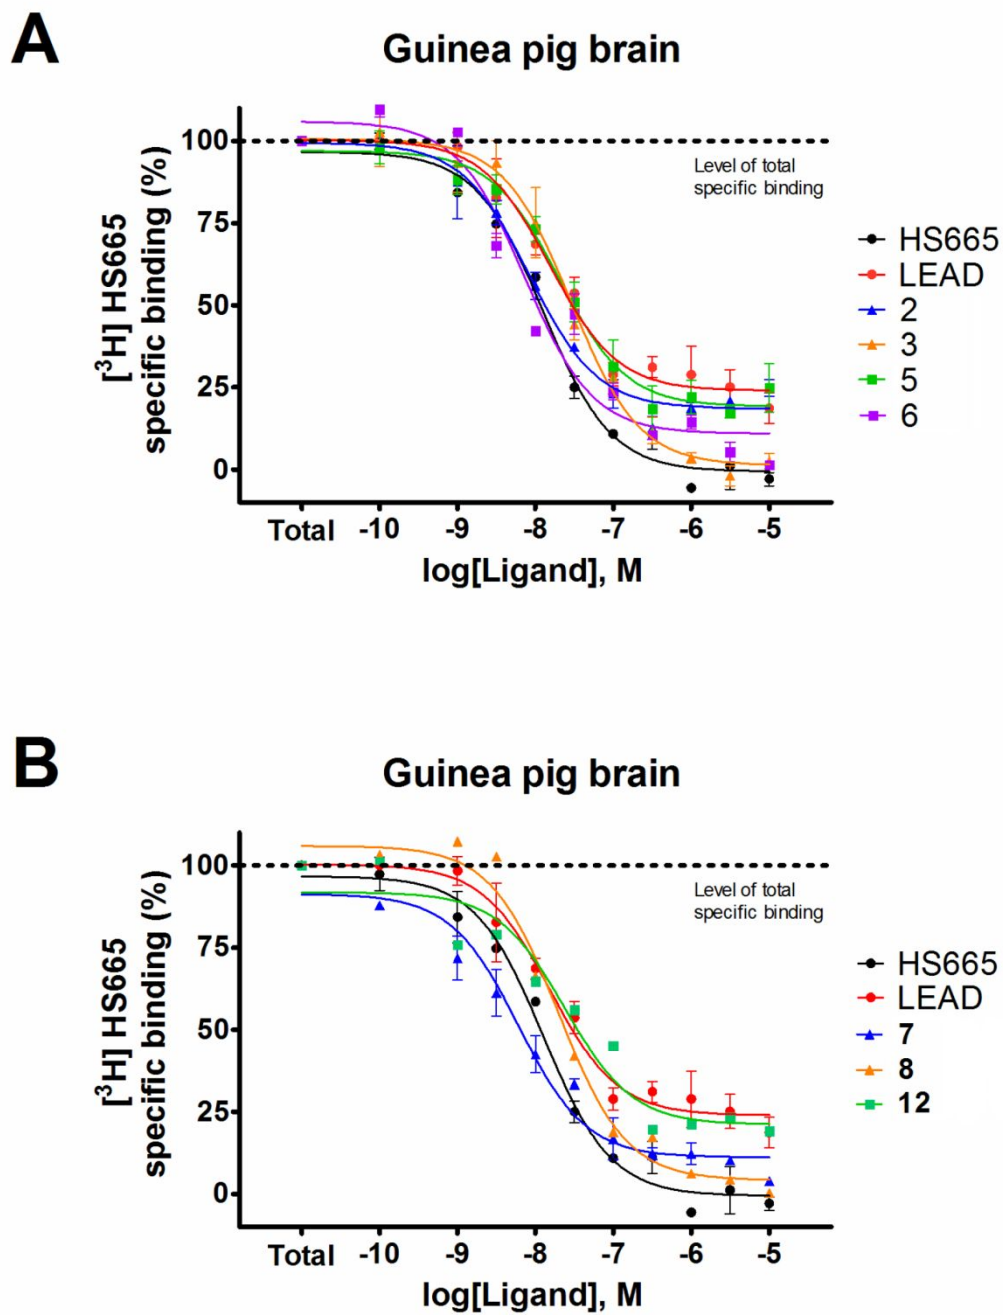

**Figure 3S.** G-protein activation of U-69, *lead compound*, 2,3,5,6 and 7,8,12 analogues.

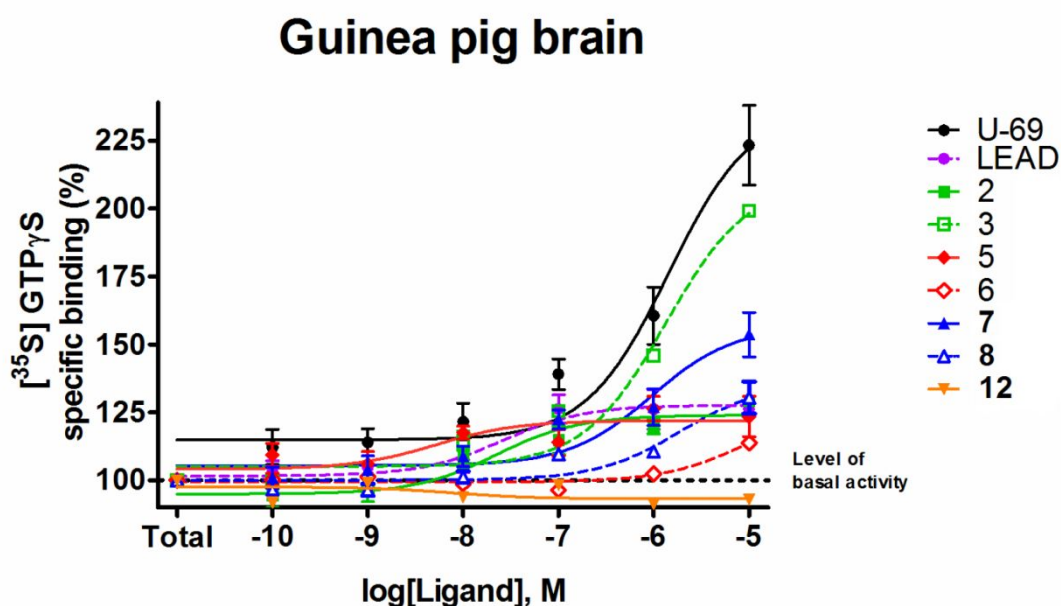

### In vivo assays

#### *Animals*

CD-1 male mice (Harlan, Italy) weighing 25-30 g were used in all experiments. Before the experimental sessions, the mice were maintained in colony, housed in cages (7 mice per cage) under standard light/dark cycle (from 7:00 AM to 7:00 PM), temperature (21±1°C) and relative humidity (60±10%) for at least 1 week. Food and water were available *ad libitum*. The research protocol was approved by the Service for Biotechnology and Animal Welfare of the Istituto Superiore di Sanità and authorized by the Italian Ministry of Health, according to Legislative Decree 26/14, which implemented the European Directive 2010/63/UE on the protection of laboratory animals in Italy (authorization number, 756/2018-PR). Animal welfare was routinely checked by veterinarians from the Service for Biotechnology and Animal Welfare.

#### *Treatment Procedure*

DMSO was purchased from Merck (Rome, Italy). Peptide solutions were freshly prepared using saline containing 0.9% NaCl and DMSO 0.1% every experimental day. These solutions were injected at a volume of 10 µL/mouse for intracerebroventricular (i.c.v.) administrations,

at a volume of 20  $\mu\text{L}$ /mouse for subcutaneous (s.c.) administrations or at a volume of 10 ml/kg for intravenous (i.v.) administration.

#### *Surgery for Intracerebroventricular Injection*

For i.c.v. injections, mice were implanted with a 22-gauge stainless steel guide cannula aimed at the lateral ventricle. Implantation was done under ketamine-xylazine (80 mg/kg ketamine-10 mg/kg xylazine mixture, intraperitoneally (i.p.)) anesthesia, and was performed at least 1 week prior to the behavioral tests. Stereotaxic coordinates for the left lateral ventricle were as follows: anteroposterior (AP) = -0.5 mm from the bregma; mediolateral = -1.0 mm from the sagittal suture; and dorsoventral = -1 mm from the skull surface. The cannula was subsequently fixed to the skull by one screw and dental acrylic. A stylet was inserted within the cannula to preserve its patent before infusions. Drug infusions were done by a 27-gauge stainless steel needle (1 mm longer than the guide cannula) attached to a Hamilton microsyringe via polyethylene tubing. The mice were allowed to move freely in the test cage during injection performed at 2  $\mu\text{L}/\text{min}$ . After injection, the injection probe was kept in place for at least 5 min to prevent backflow. Before the experiments, the mice had at least 5–7 days recovery period.

#### *Tail flick test*

The tail flick latency was obtained using a commercial unit (Ugo Basile, Italy), consisting of an infrared radiant light source (100 W, 20 V bulb) focused onto a photocell utilizing an aluminum parabolic mirror. During the trials the mice were gently hand-restrained with a glove. Radiant heat was focused 3–4 cm from the tip of the tail, and the latency (s) of the tail withdrawal recorded. The measurement was interrupted if the latency exceeded the cut off time (30 s). The baseline was calculated as mean of three readings recorded before testing at intervals of 15–30 min and the time course of latency determined at 15, 30, 45, 60, 90 and 120 min after treatment. In the tail flick test, data were expressed as time course of the percentage of maximum effect (%MPE) =  $(\text{post drug latency} - \text{baseline latency}) / (\text{cut-off time} - \text{baseline latency}) \times 100$ . Then, the area under the curve was calculated with the aid of a computer program (GraphPad Prism 9.3.1).

#### *Formalin Test*

In the formalin test, the injection of a dilute solution of formalin (1%, 20  $\mu\text{L}/\text{paw}$ ) into the dorsal surface of the mouse hind paw evoked biphasic nociceptive behavioral responses, such as licking, biting the injected paw, or both, occurring from 0 to 10 min after formalin

injection (the early phase) and a prolonged phase, occurring from 10 to 40 min (the late phase). Before the test, mice were individually placed in a Plexiglas observation cage (30 × 14 × 12 cm) for one hour, to acclimatize to the testing environment. The total time the animal spent licking or biting its paw during the early and late phase of formalin-induced nociception was recorded.

#### *Data Analysis and Statistics*

Experimental in vivo data were expressed as mean ± s.e.m. Significant differences among the groups were evaluated with one-way ANOVA followed by Dunnett's multiple comparisons test. GraphPad Prism 9.3.1 software was used for all the analyses. Statistical significance was set at  $p < 0.05$ . The data and statistical analysis comply with the recommendations on experimental design and analysis in pharmacology.

## RP-HPLC traces

### 1: *p*(F)-D-Phe-D-Phe-D-NLeu-D-Arg-NH<sub>2</sub>

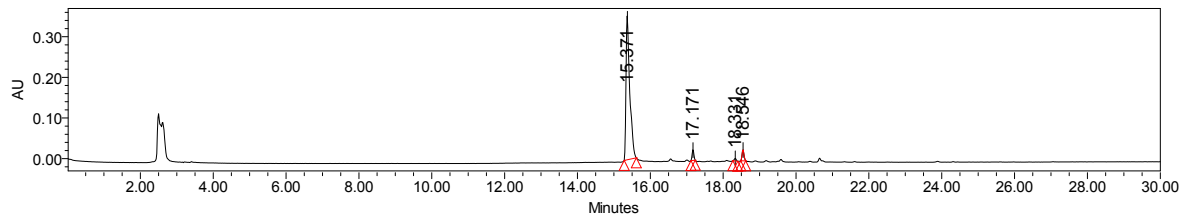

|   | Retention Time | % Area | Height |
|---|----------------|--------|--------|
| 1 | 15.371         | 92.08  | 353107 |
| 2 | 17.171         | 3.30   | 25371  |
| 3 | 18.331         | 0.86   | 6176   |
| 4 | 18.546         | 3.76   | 26434  |

### 2: *m*(F)-D-Phe-D-Phe-D-NLeu-D-Arg-NH<sub>2</sub>

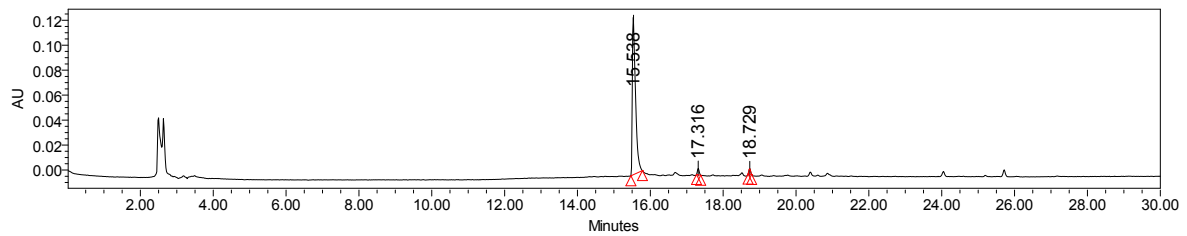

|   | Retention Time | % Area | Height |
|---|----------------|--------|--------|
| 1 | 15.538         | 96.01  | 126563 |
| 2 | 17.316         | 2.16   | 4952   |
| 3 | 18.729         | 1.83   | 4380   |

### 3: *o*(F)-D-Phe-D-Phe-D-NLeu-D-Arg-NH<sub>2</sub>

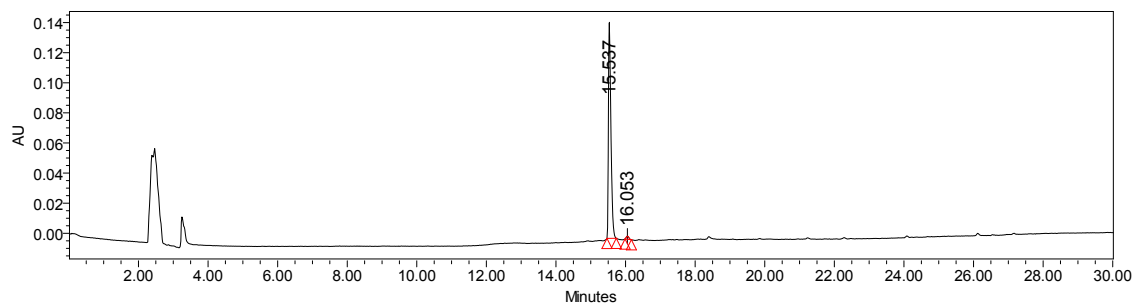

4: D-Tic-D-Phe-D-NLeu-D-Arg-NH<sub>2</sub>

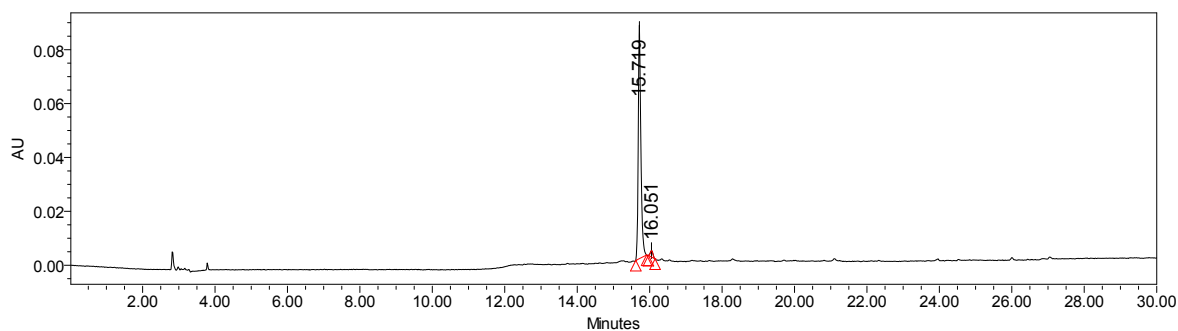

|   | Retention Time | % Area | Height |
|---|----------------|--------|--------|
| 1 | 15.719         | 97.23  | 85012  |
| 2 | 16.051         | 2.77   | 2392   |

5: D-Trp-D-Phe-D-NLeu-D-Arg-NH<sub>2</sub>

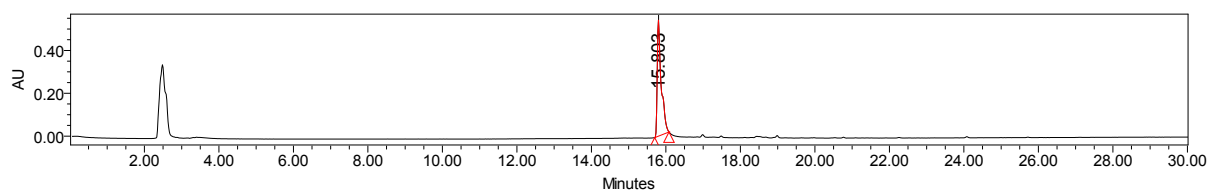

6: D-Tyr-D-Phe-D-NLeu-D-Arg-NH<sub>2</sub>

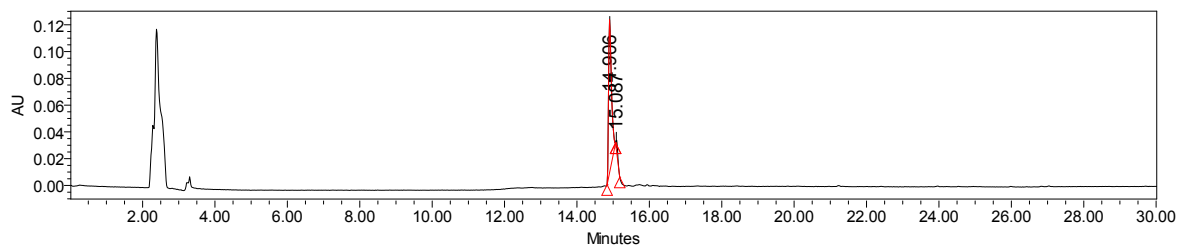

|   | Retention Time | % Area | Height |
|---|----------------|--------|--------|
| 1 | 14.906         | 95.77  | 113917 |
| 2 | 15.087         | 4.23   | 7072   |

7: D-Phe-*p*(F)-D-Phe-D-NLeu-D-Arg-NH<sub>2</sub>

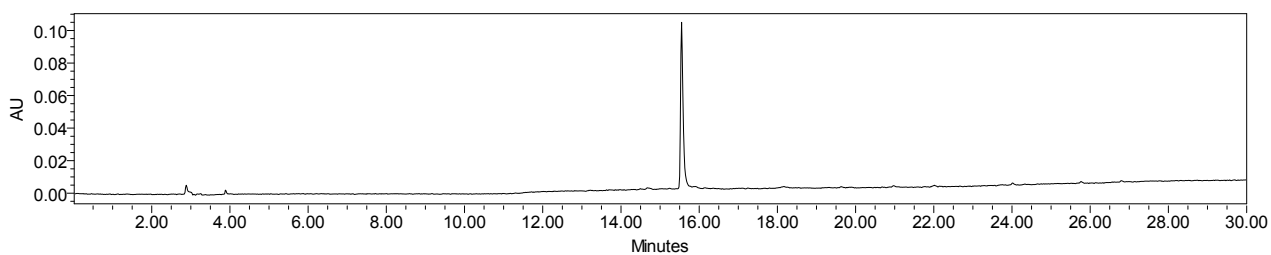

|   | Retention Time | Height |
|---|----------------|--------|
| 1 | 15.553         | 99177  |

8: D-Phe-*m*(F)-D-Phe-D-NLeu-D-Arg-NH<sub>2</sub>

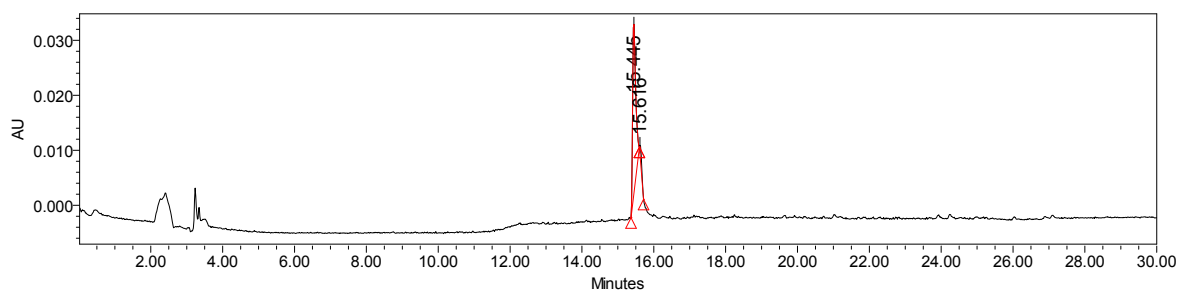

|   | Retention Time | % Area | Height |
|---|----------------|--------|--------|
| 1 | 15.445         | 95.06  | 31438  |
| 2 | 15.616         | 4.94   | 1814   |

9: D-Phe-*o*(F)-D-Phe-D-NLeu-D-Arg-NH<sub>2</sub>

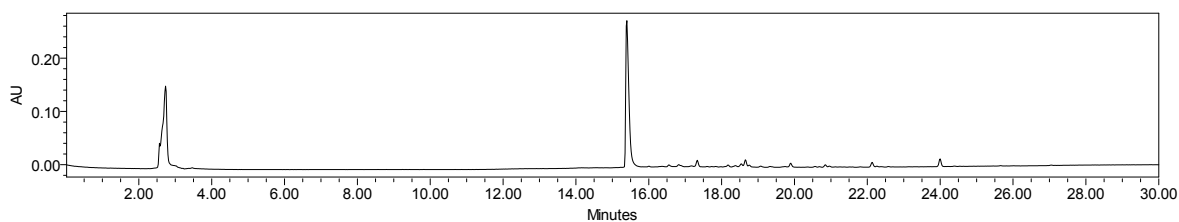

|   | Retention Time | % Area | Height |
|---|----------------|--------|--------|
| 1 | 15.402         | 100.00 | 273212 |

10: D-Phe-D-Tyr-D-NLeu-D-Arg-NH<sub>2</sub>

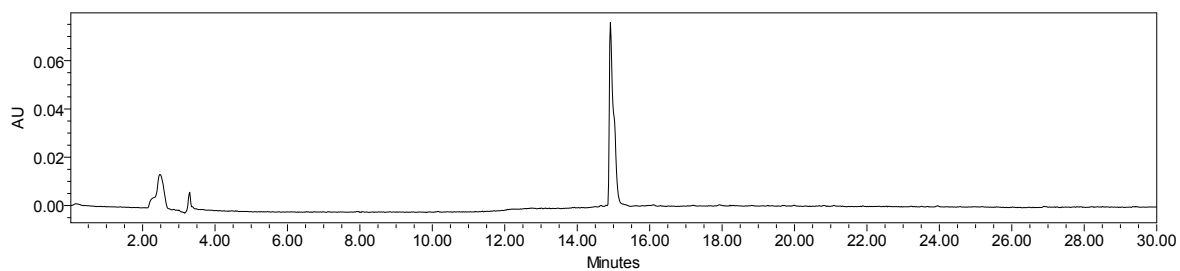

|   | Retention Time | Height |
|---|----------------|--------|
| 1 | 14.922         | 75458  |

11: D-Phe-D-Trp-D-NLeu-D-Arg-NH<sub>2</sub>

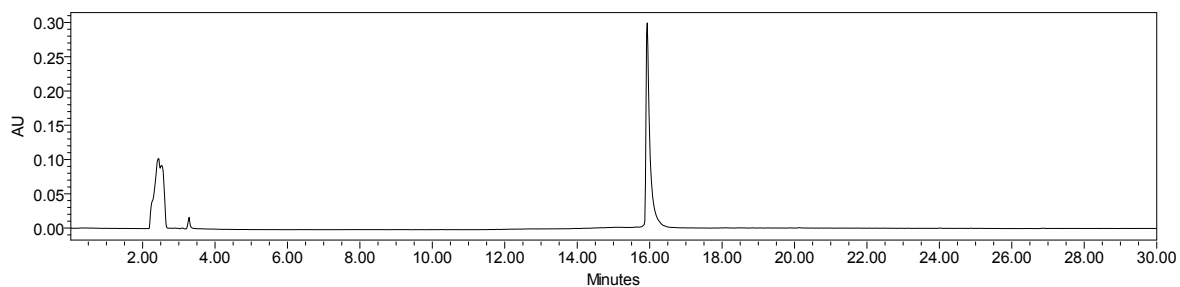

|   | Retention Time | Height |
|---|----------------|--------|
| 1 | 15.934         | 232392 |

12: D-Phe-D-Tic-D-NLeu-D-Arg-NH<sub>2</sub>

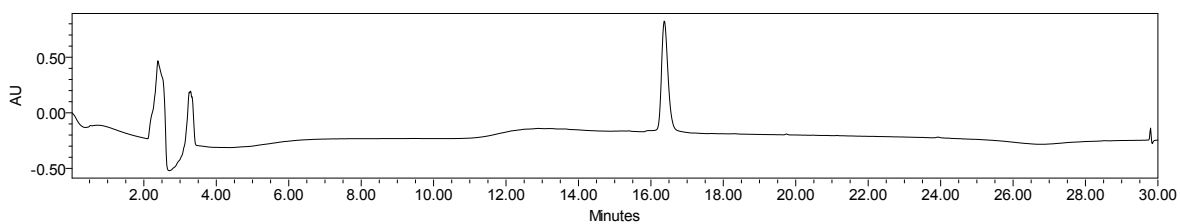

|   | Retention Time | Height |
|---|----------------|--------|
| 1 | 16.372         | 10880  |



# LRMS of tetrapeptides 1-12

1

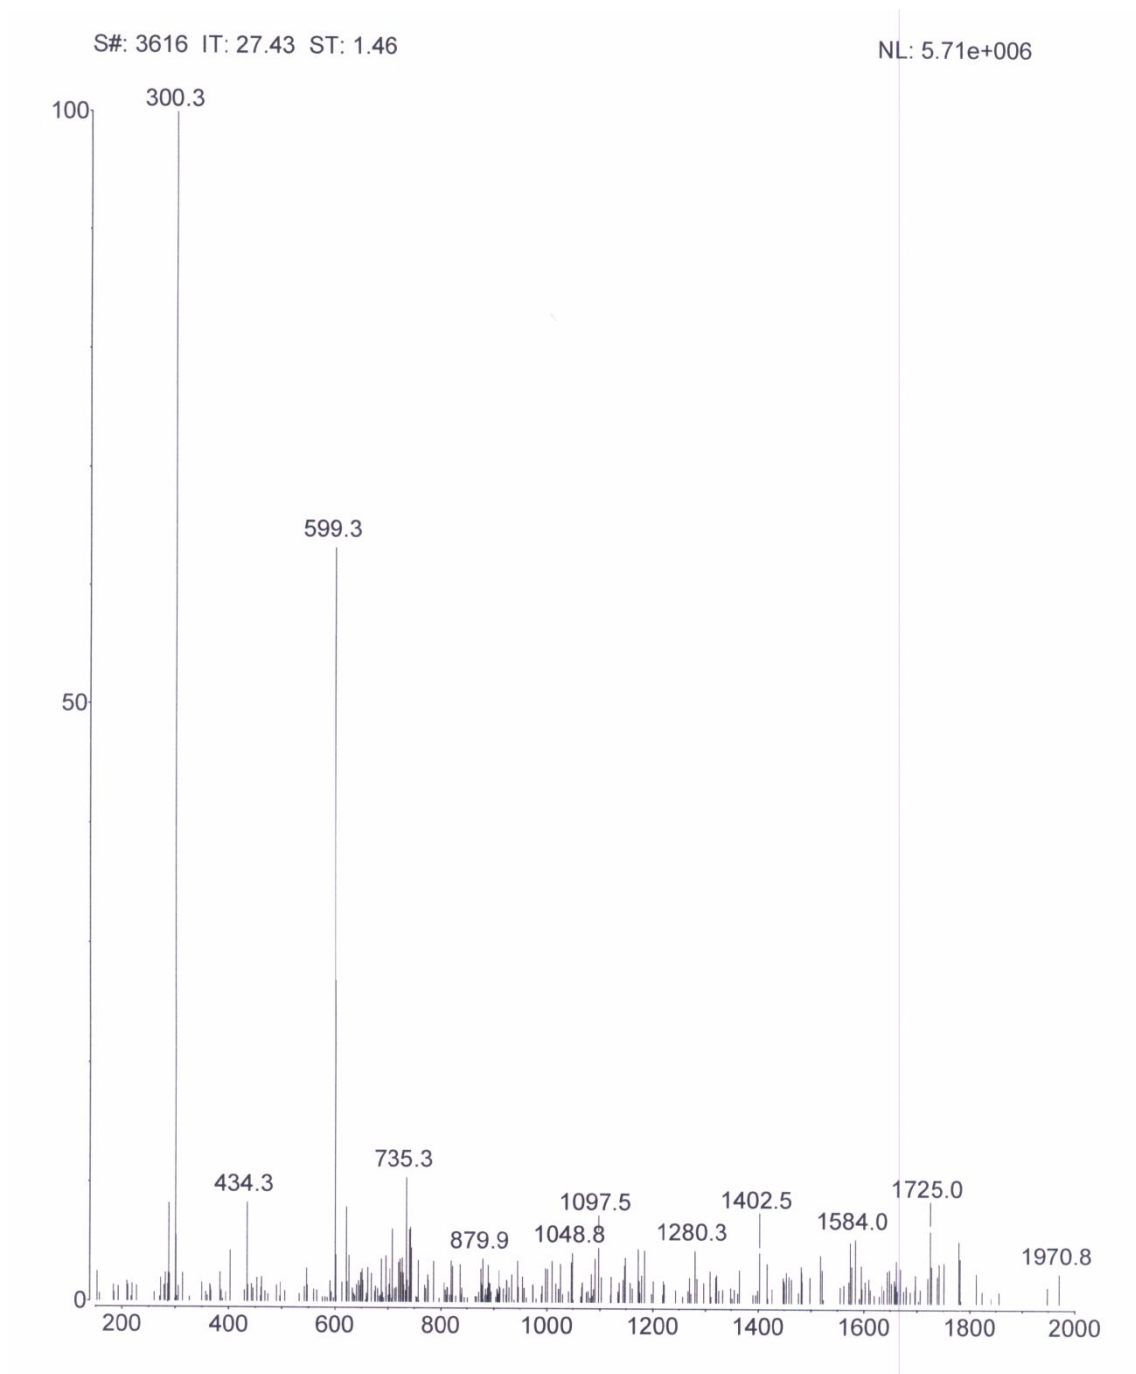

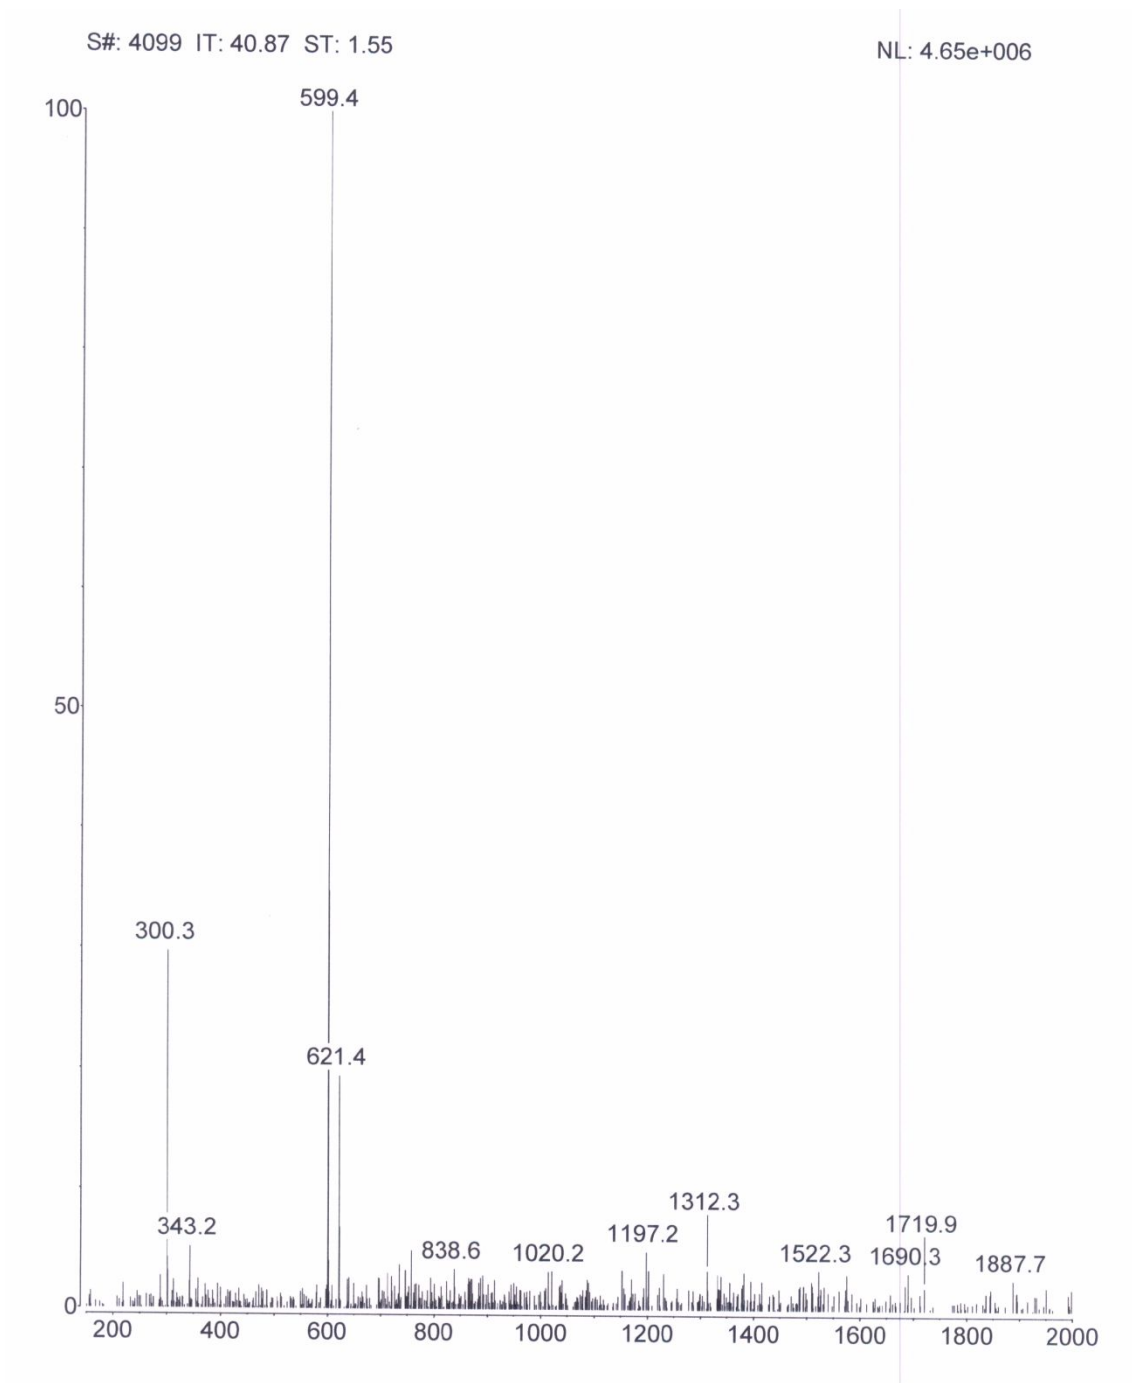

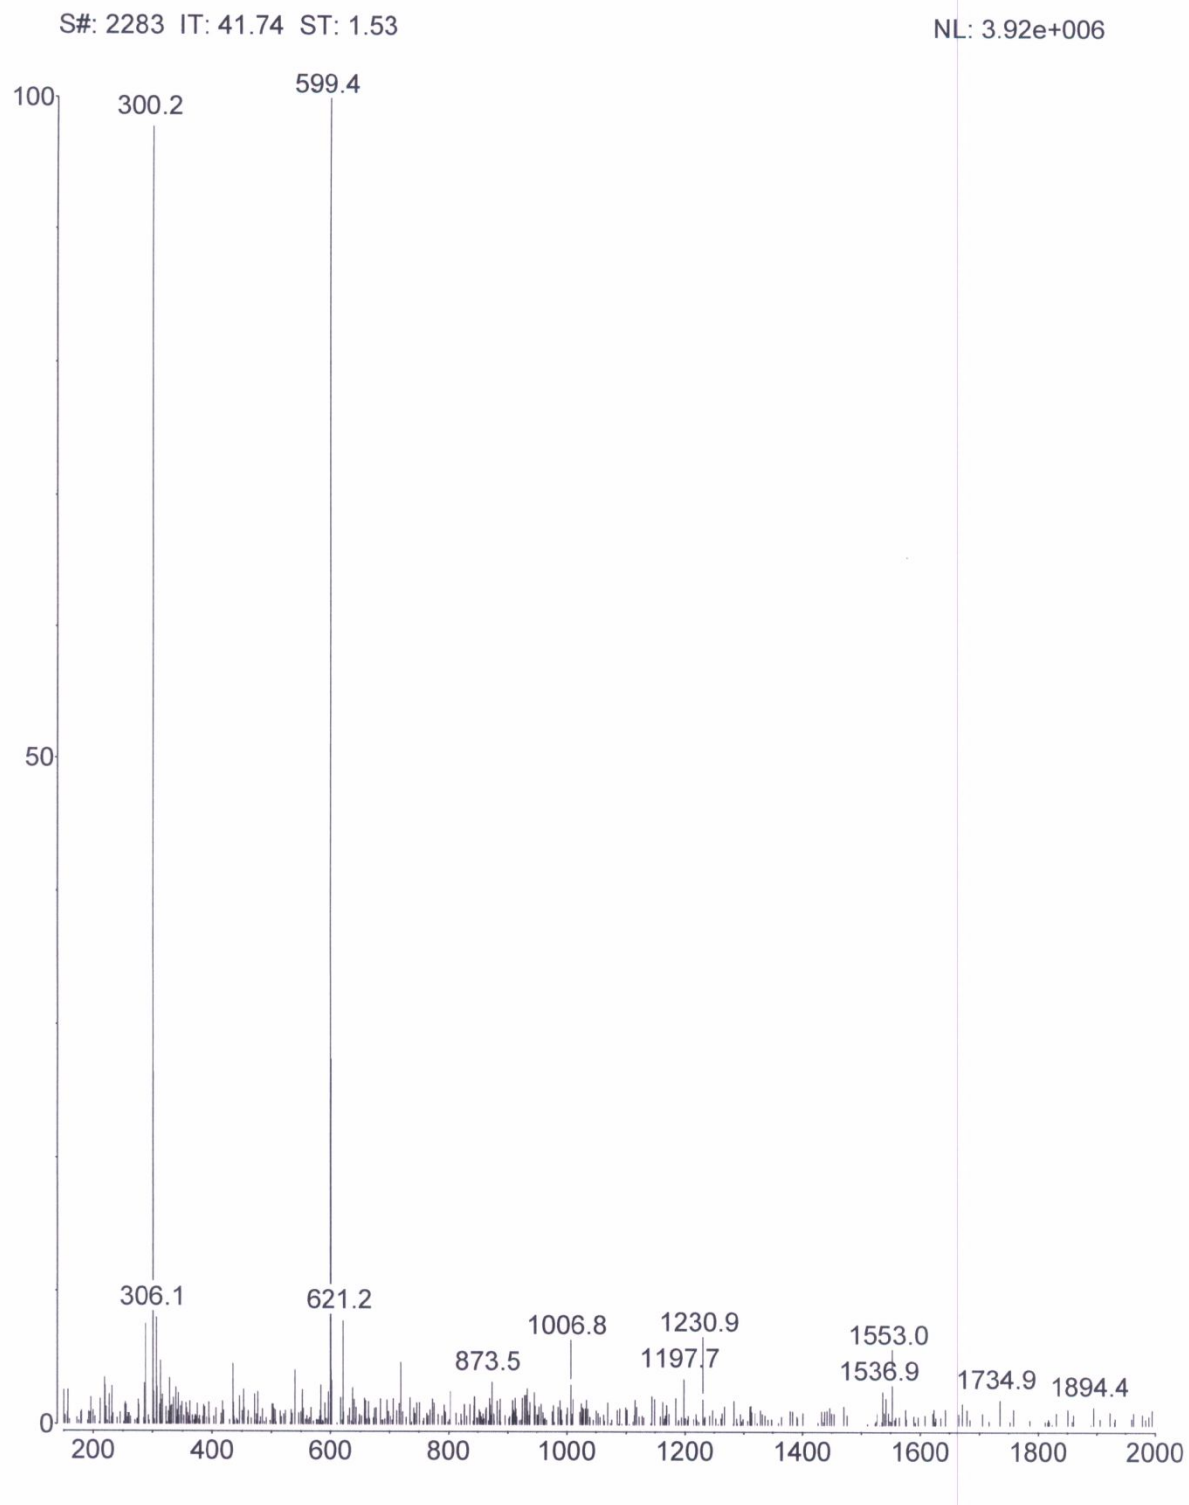

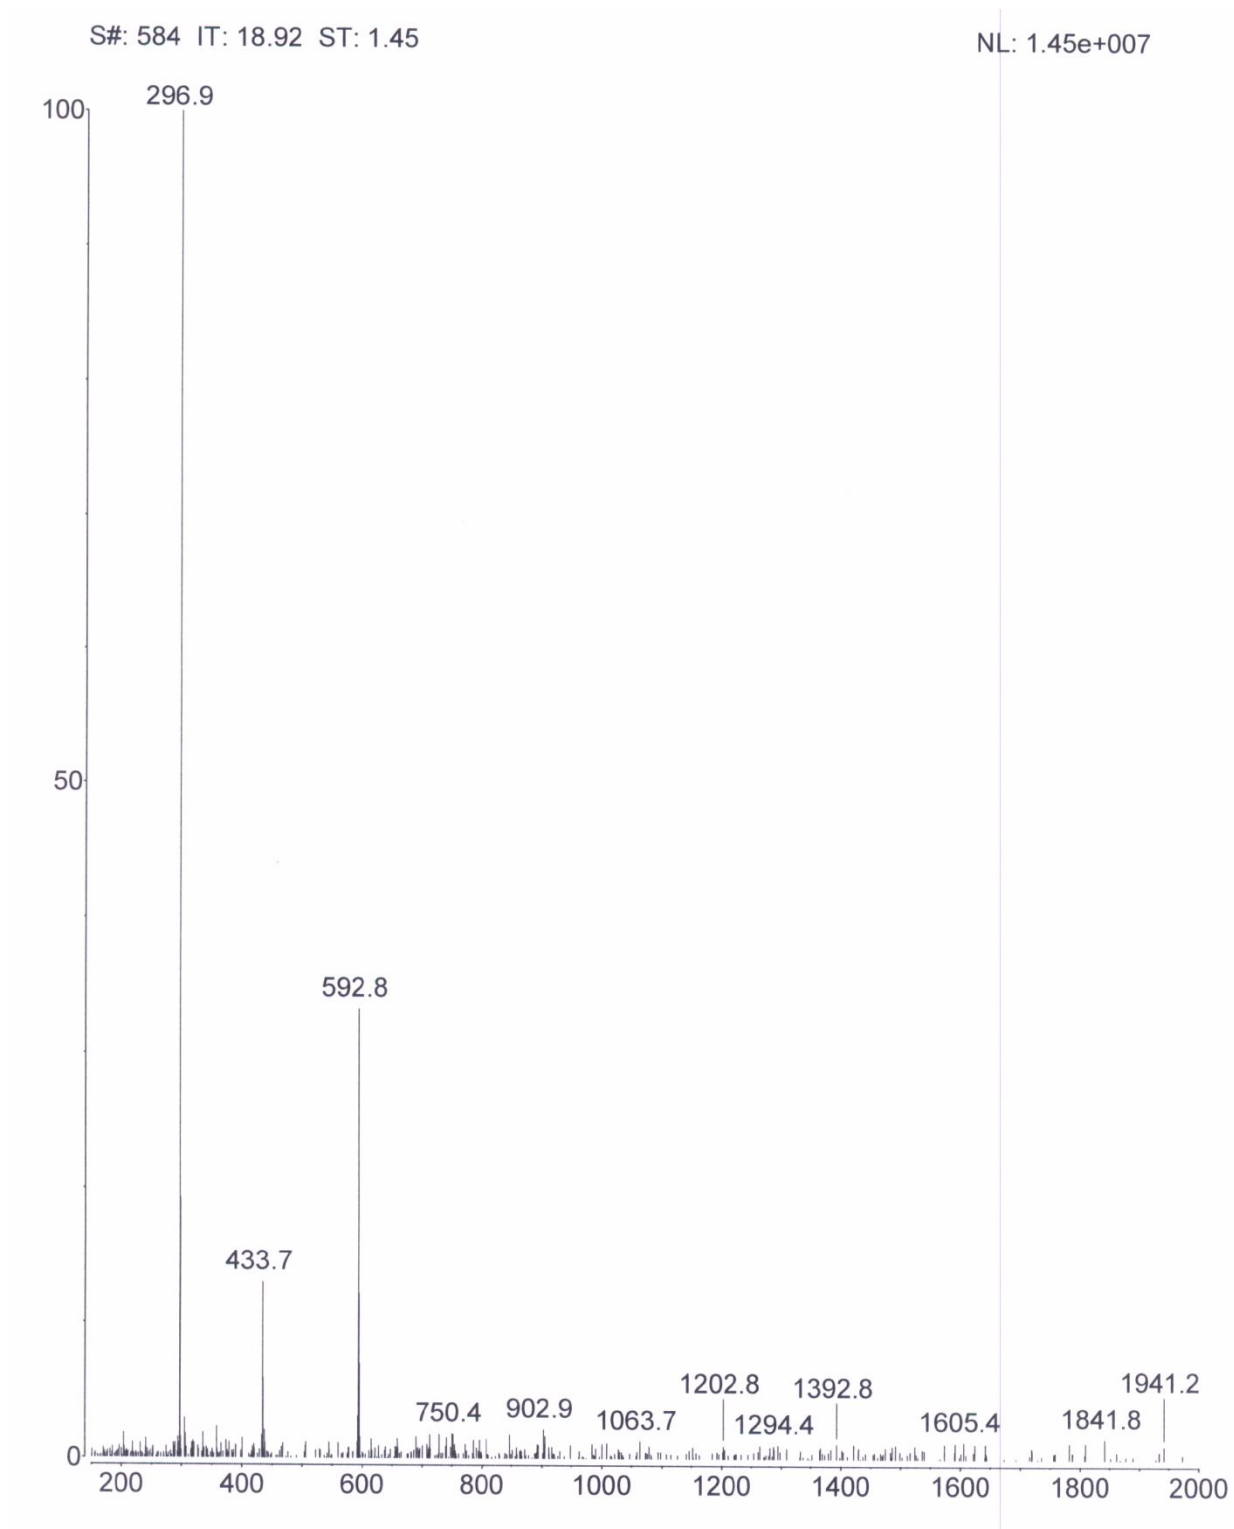

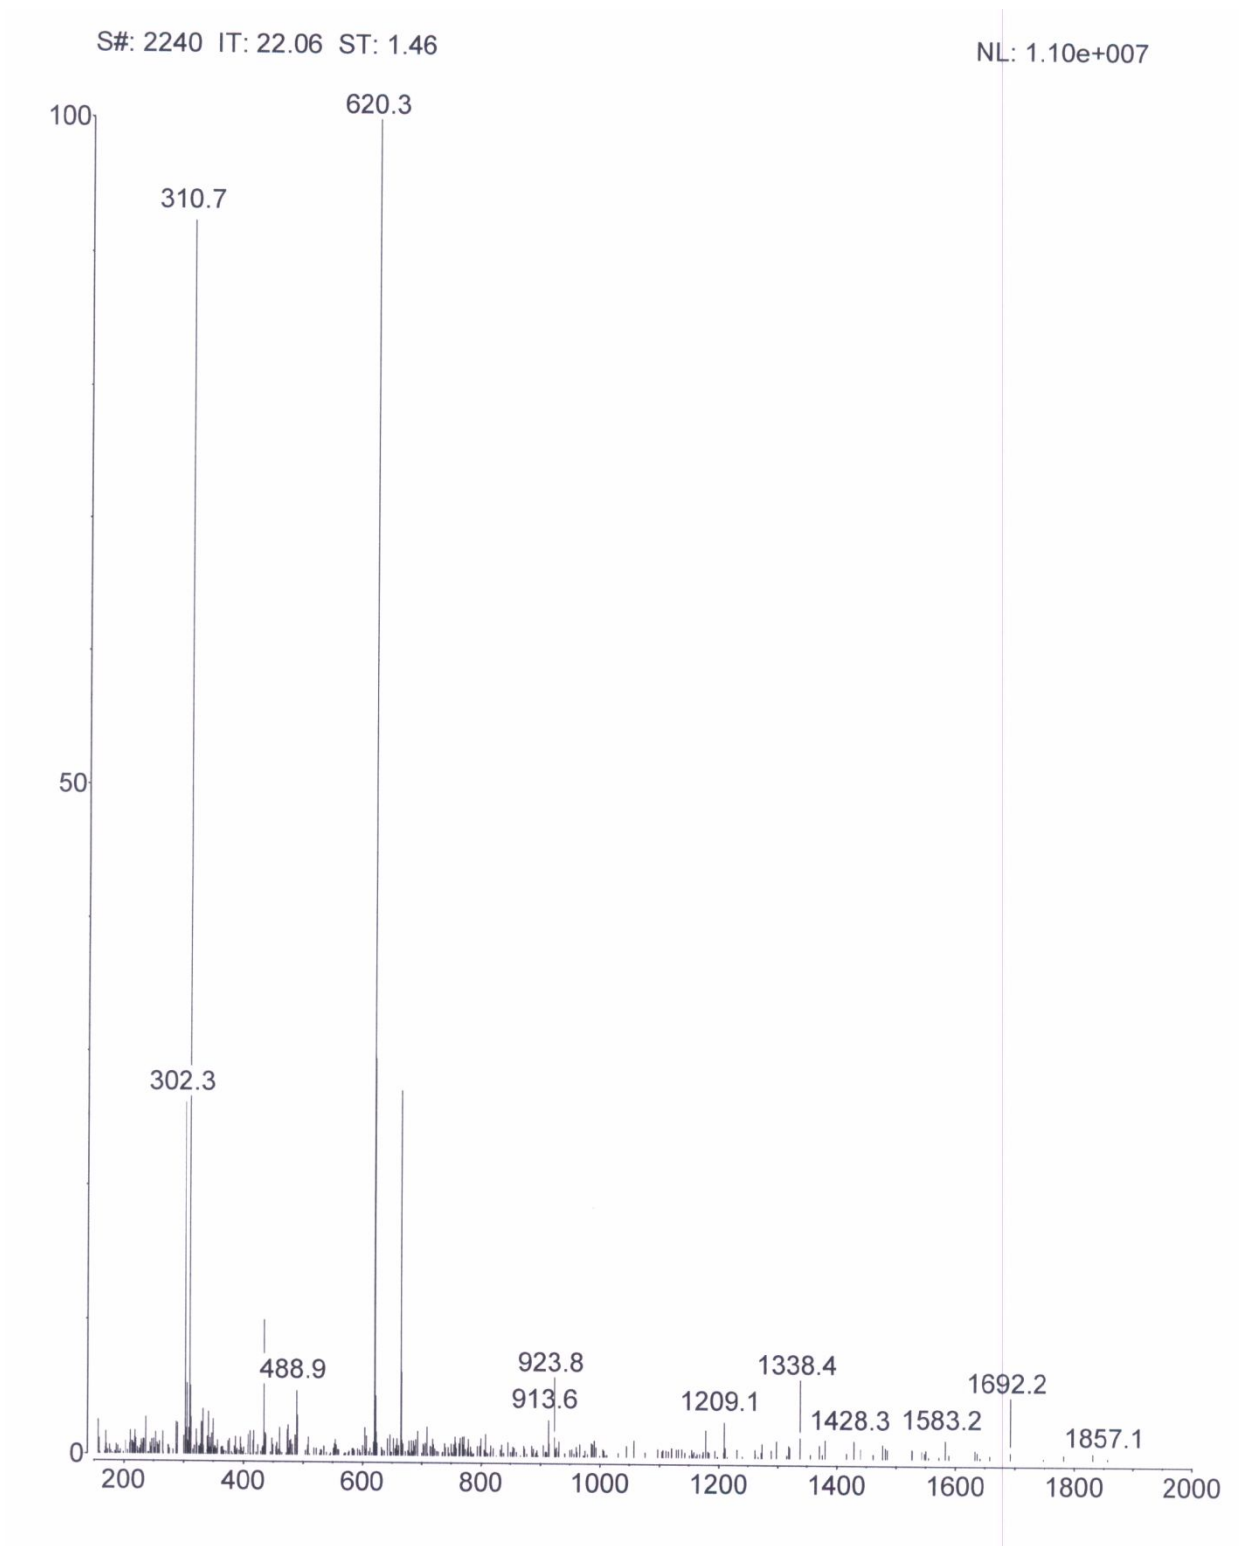

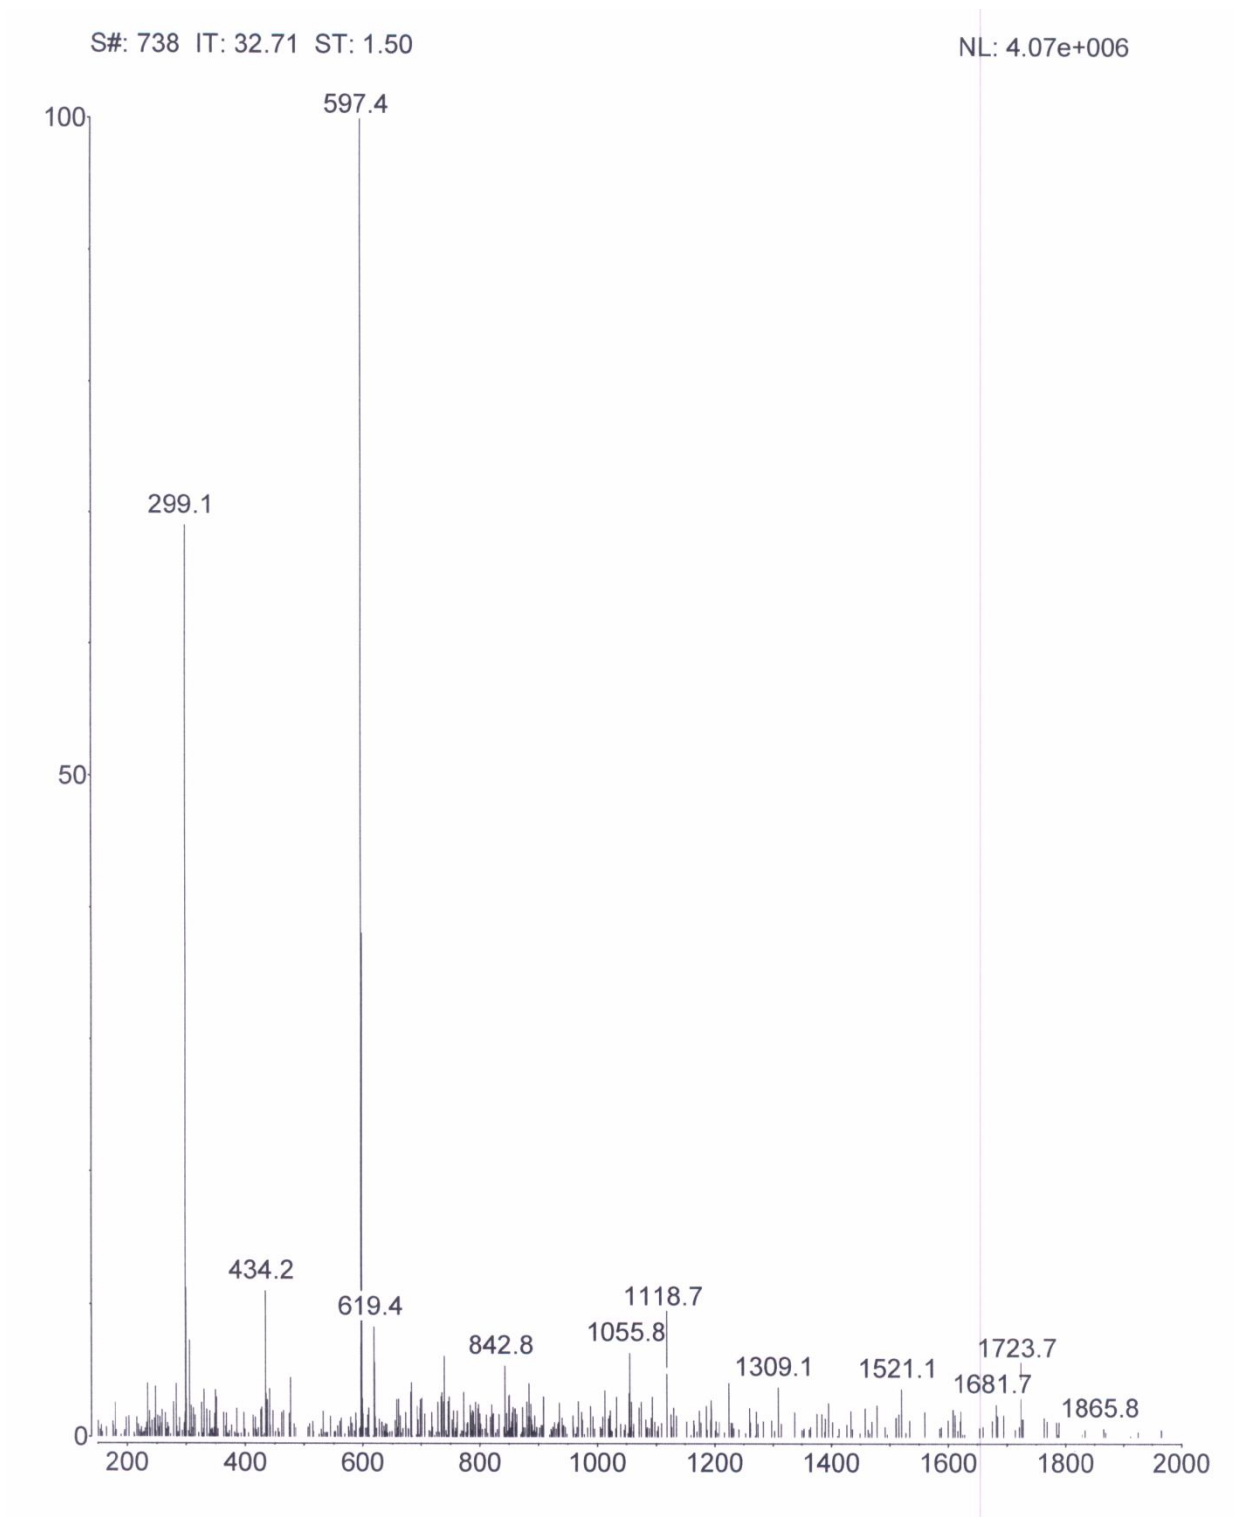

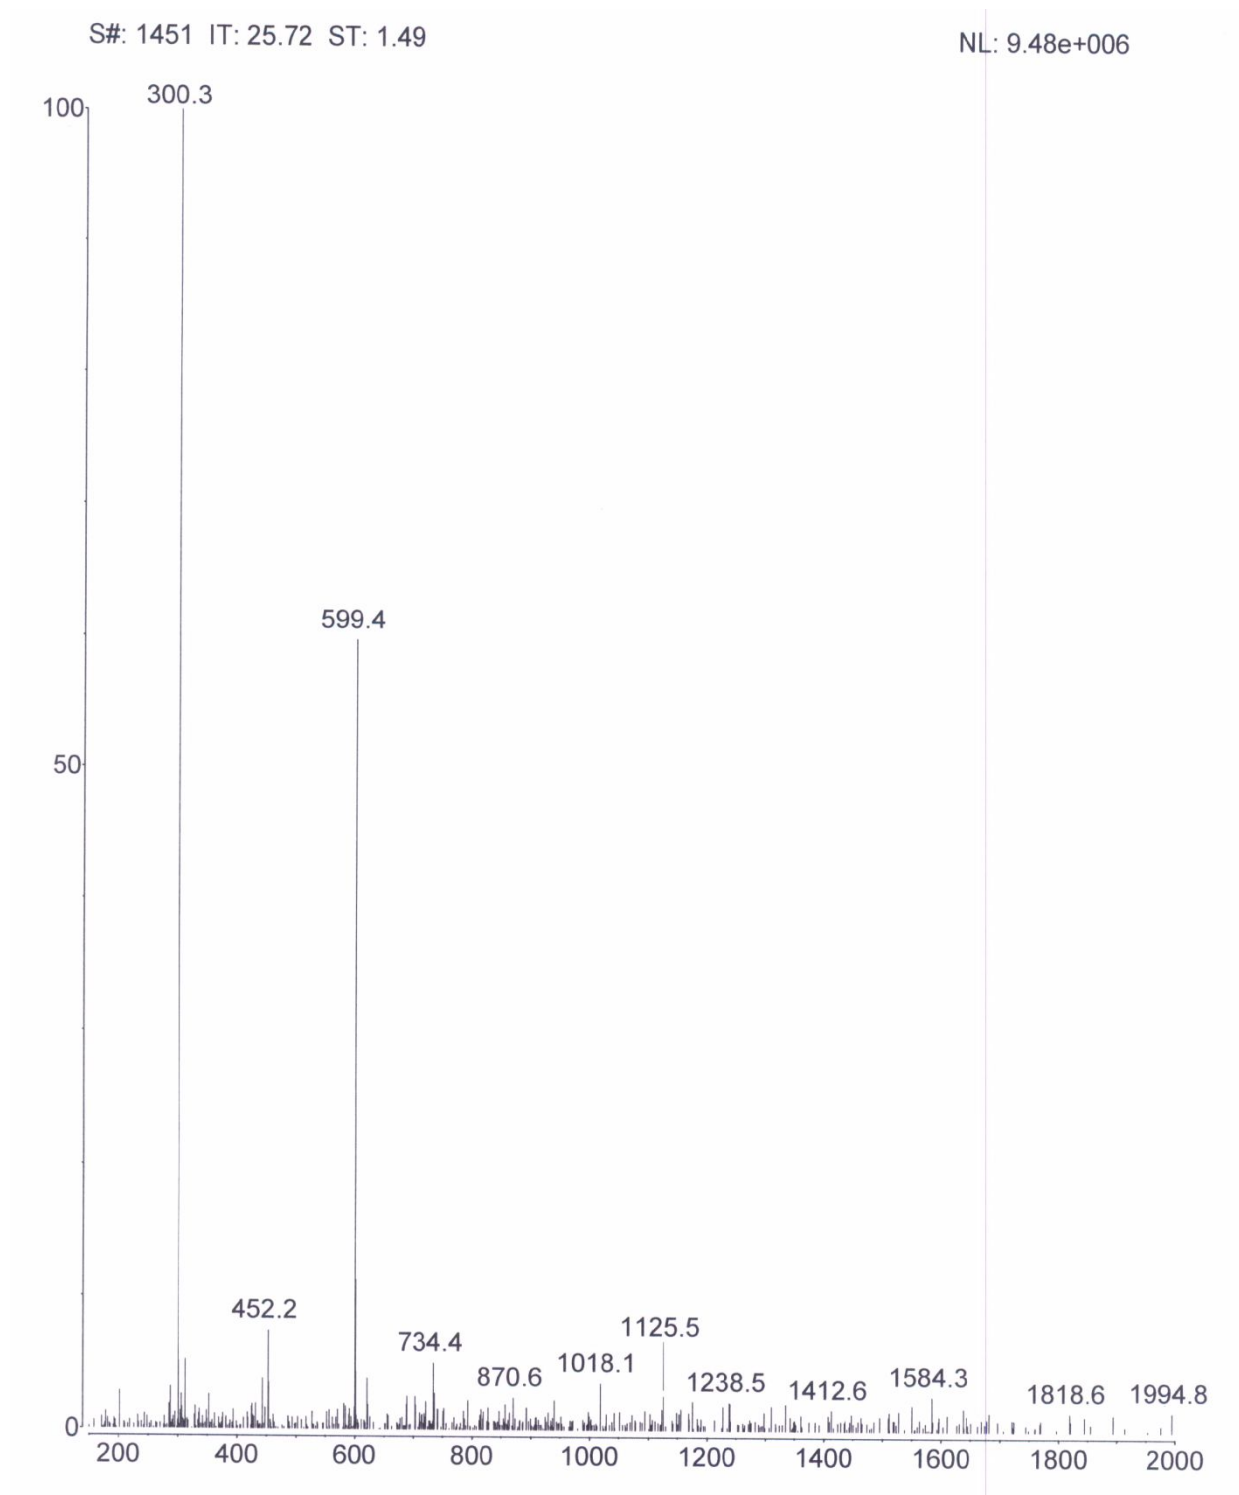

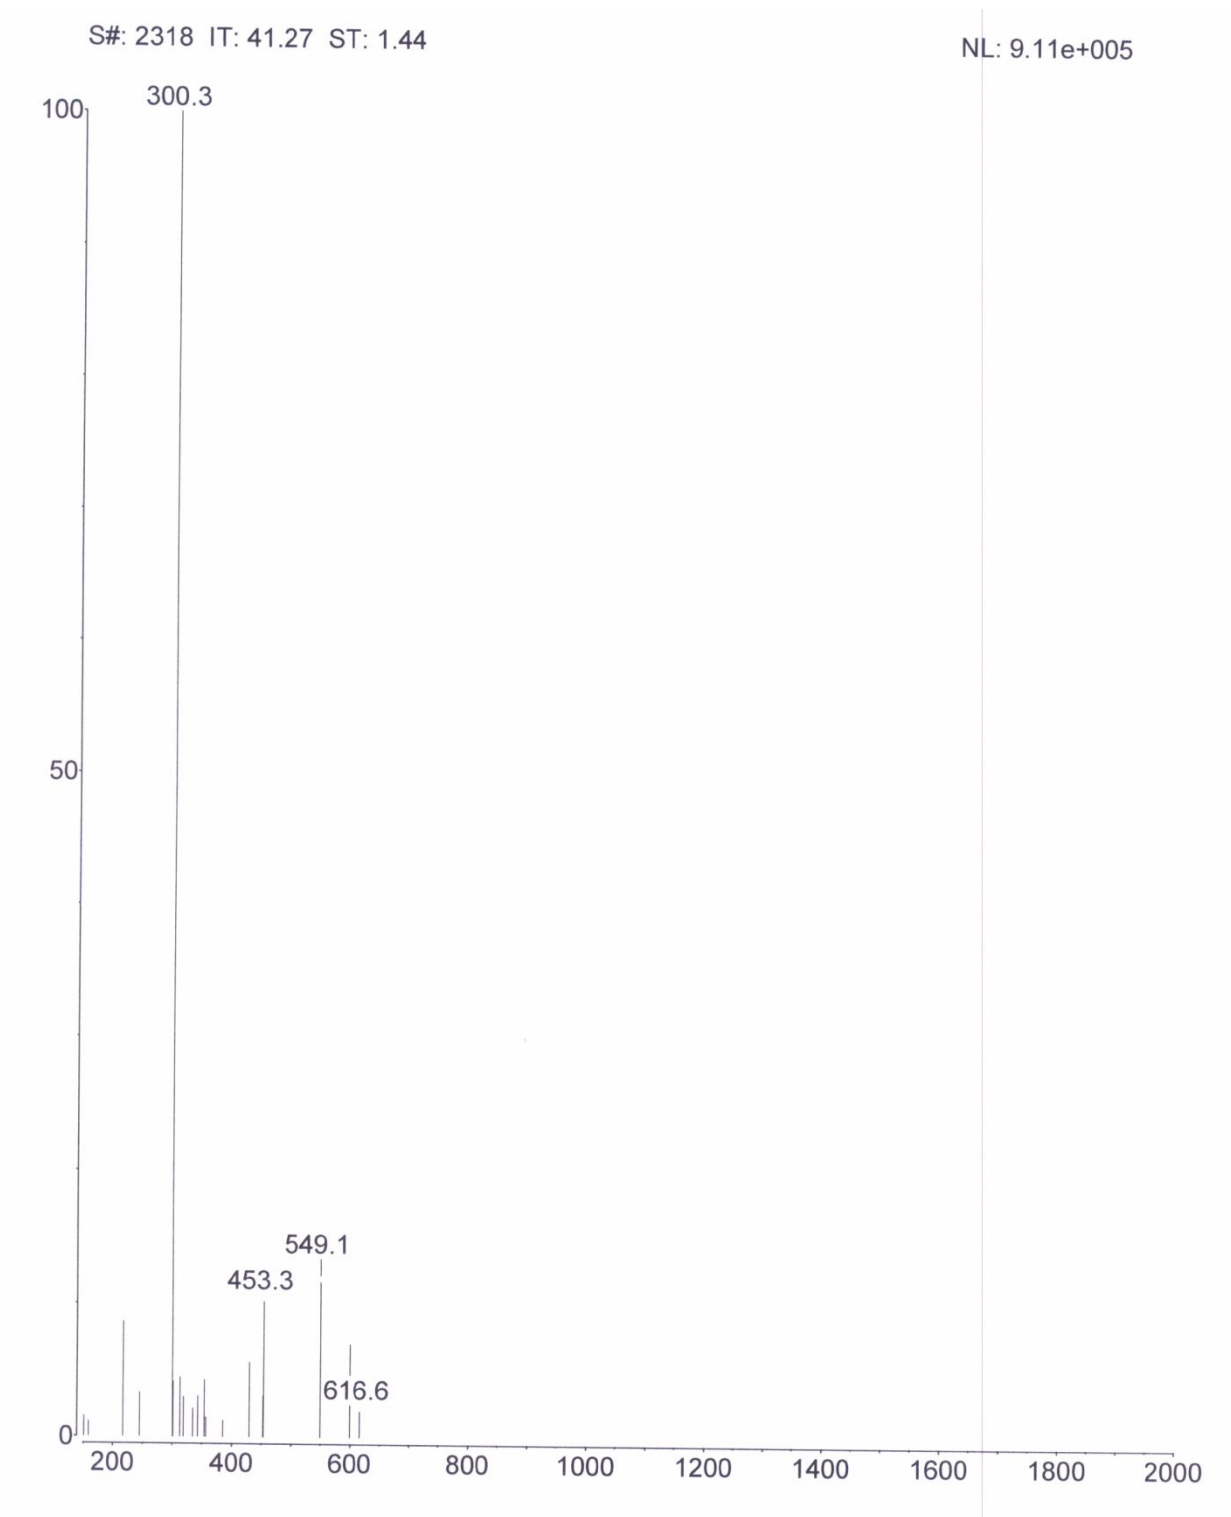



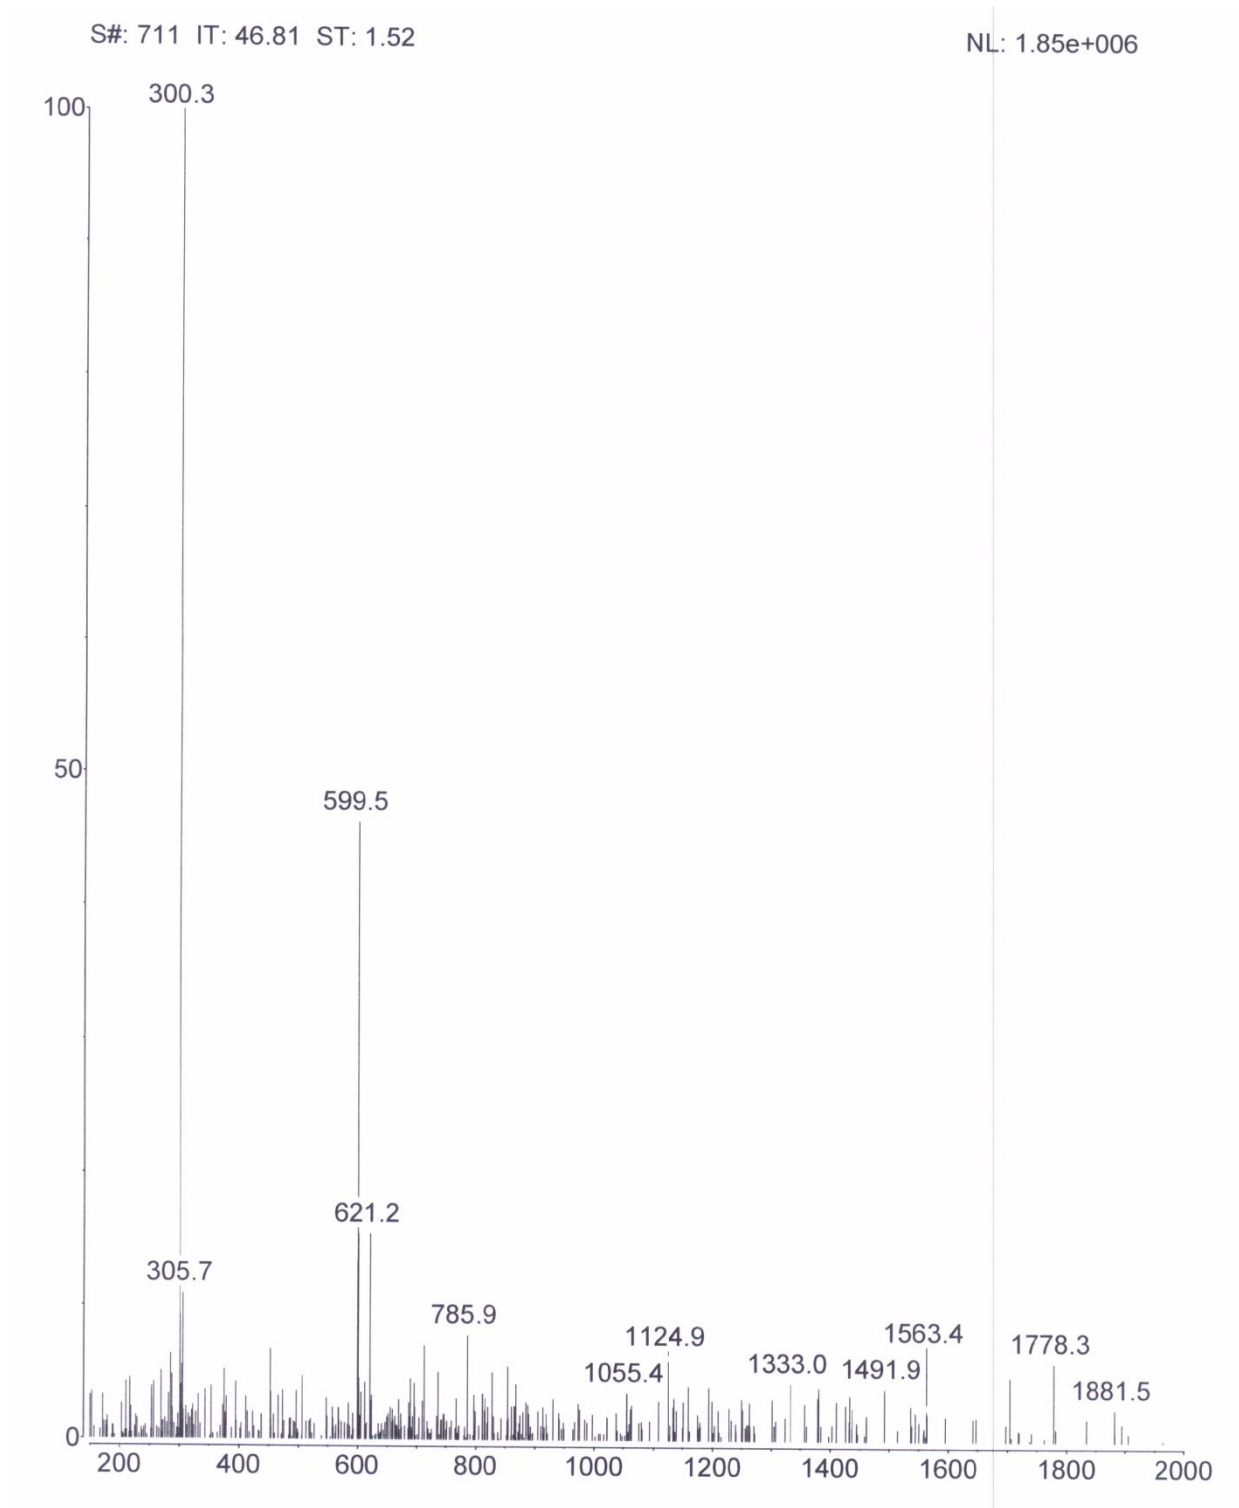

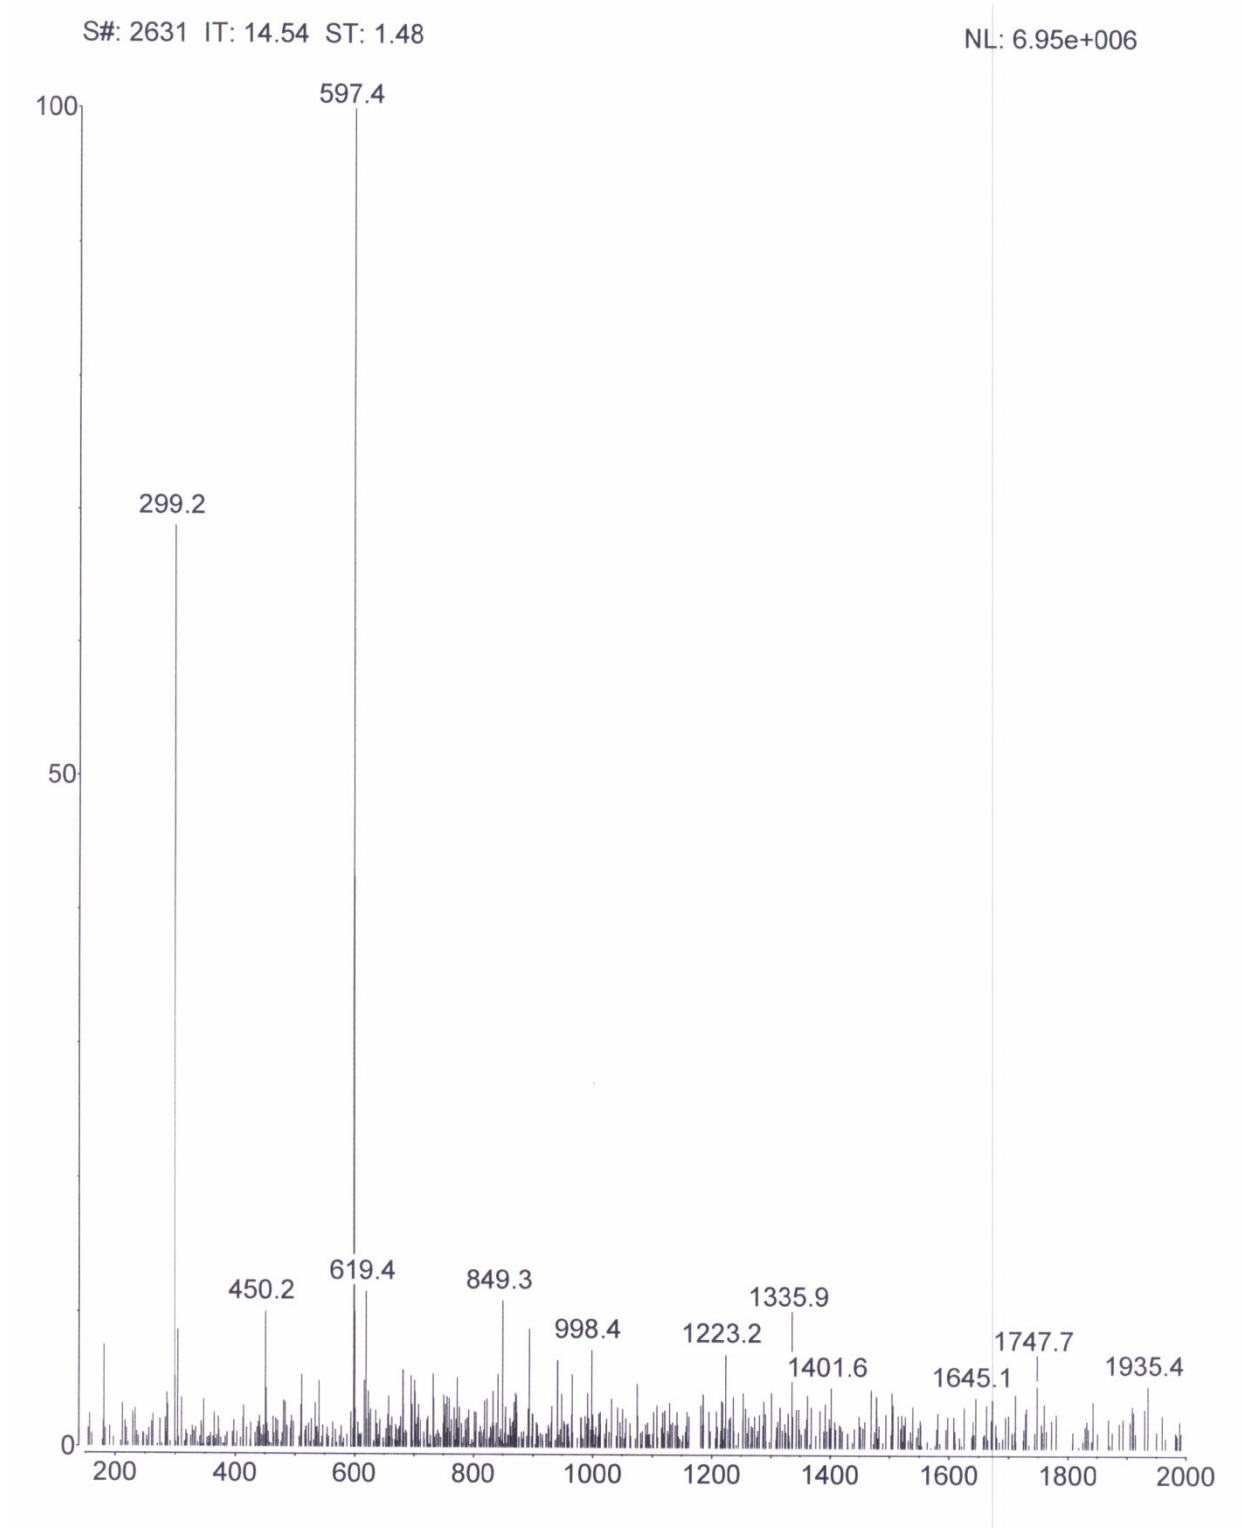

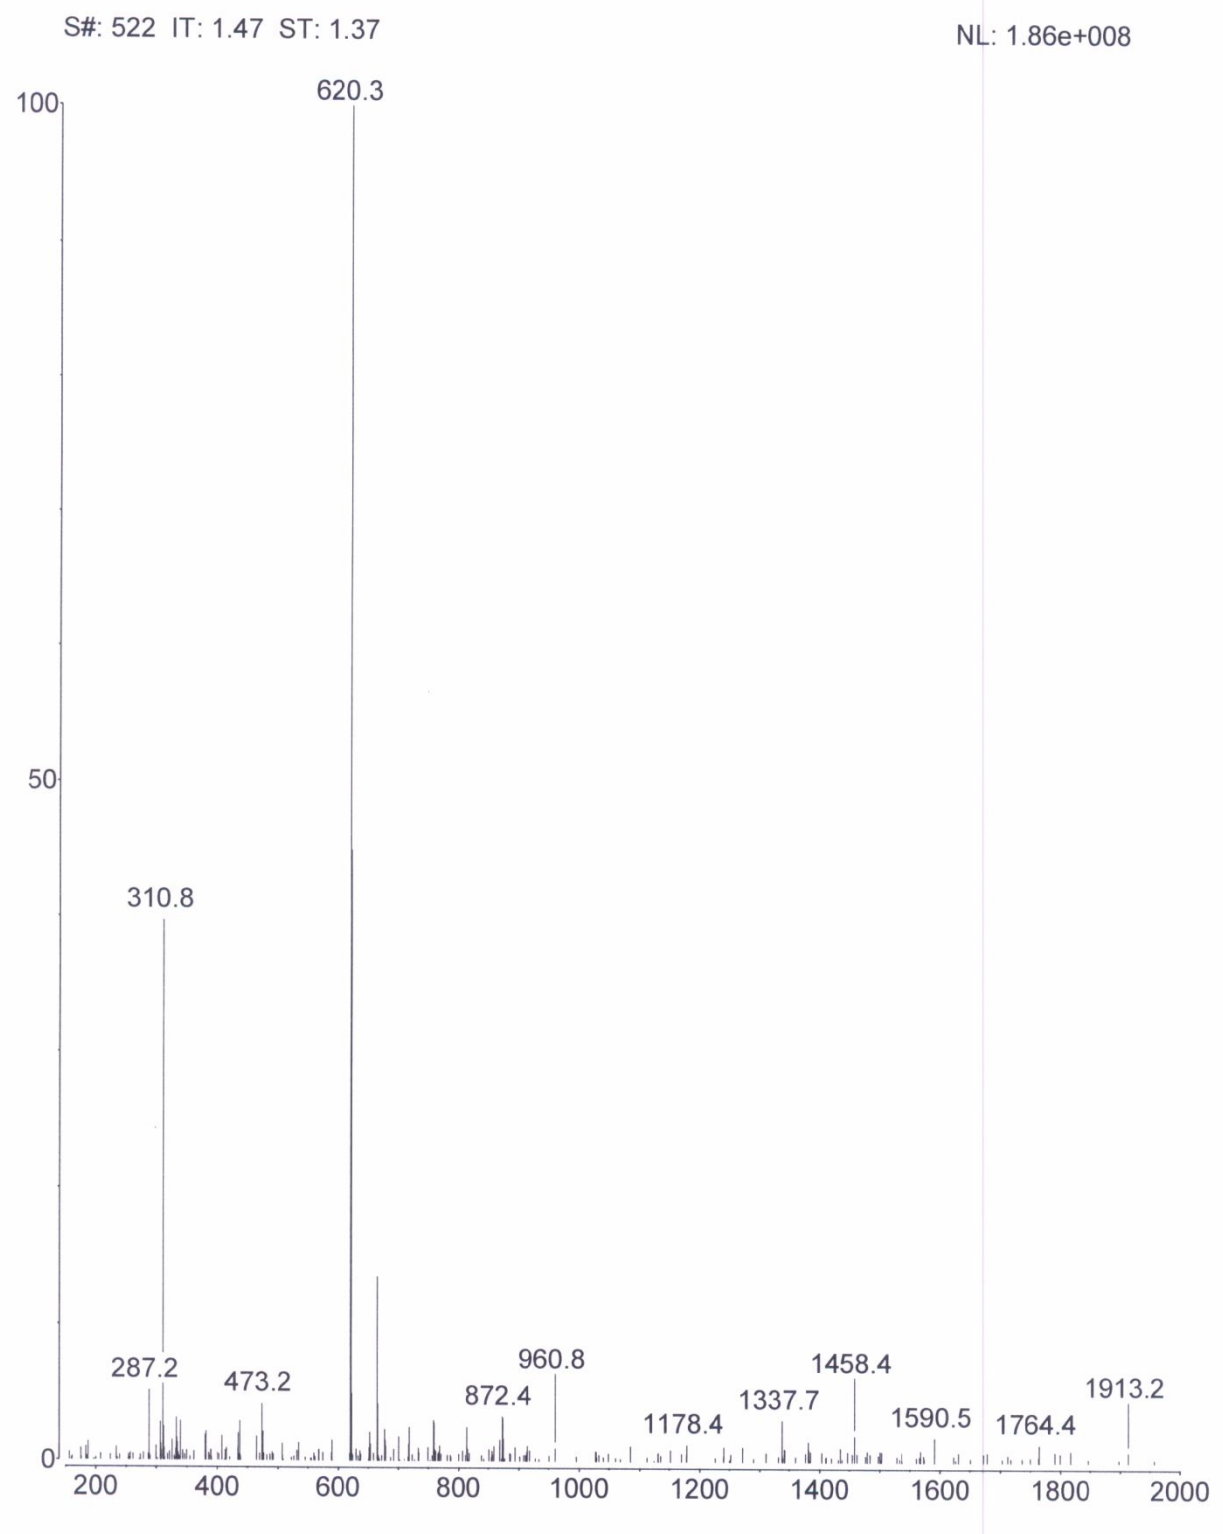

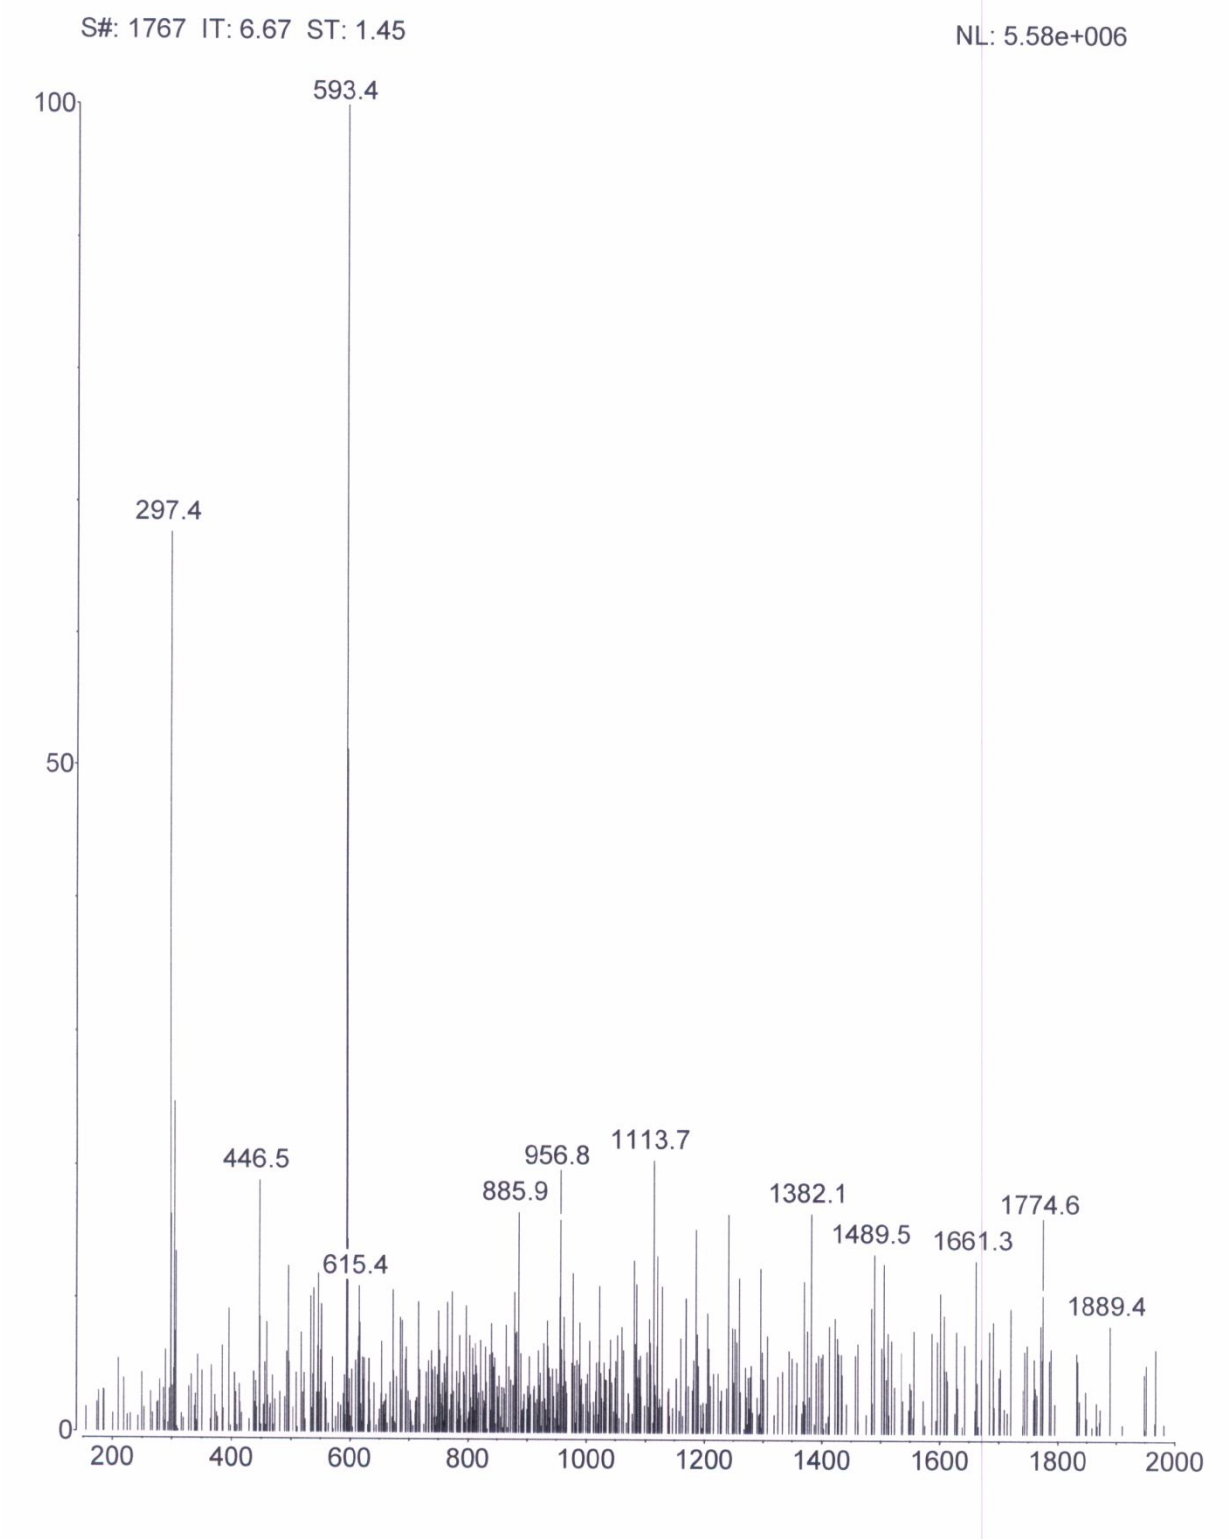

## Pharmacokinetic study

### Materials

C57/BL6 Mouse Plasma  
5.00 mM DMSO stock solutions of FP200041 and 7  
Microcentrifuge tubes  
Microcentrifuge  
MilliQ water  
Methanol  
Formic acid  
Samples of plasma and brain collected during in vivo study  
Pipettes and Pipette tips  
150  $\mu$ L conical bottom 96 well plates  
Homogenizer

### Plasma Extraction

1. Calibration standards in plasma were prepared in mouse plasma via serial dilution from a concentration of 5000 nM to a concentration of 1.00 nM using a dilution pattern of 1:2.5:2:2. The actual range of the calibration curve was to be tailored to the concentration observed in the samples at the time of analysis.
2. Study samples were thawed on ice.
3. A volume of 50  $\mu$ L sample, blank plasma, or calibration standard was transferred to a microcentrifuge tube.
4. Add 200  $\mu$ L methanol to each microcentrifuge tube.
5. Vortex for 2 minutes.
6. Centrifuge tubes for 10 minutes at 14000 rpm in a microcentrifuge.
7. Transfer 100  $\mu$ L of the supernatant to a 96 well plate for analysis.
8. Inject 10  $\mu$ L for LC/MS/MS analysis.

### Brain Extraction

1. Brains were individually weighed on a microbalance, and weights were recorded.
2. A volume of MilliQ water was added to each tube such that the resulting tissue concentration was 0.5 mg/mL.
3. Brain tissue and water was homogenized with a Fisher Scientific PowerGen 700 at a speed of 4000 rpm until the resulting solution was uniform in appearance.
4. Homogenizer probe was rinsed at 4000 rpm in fresh HPLC grade water, and then disassembled and washed in MilliQ water subsequent to the processing of each sample.
5. Homogenized brain samples were stored at -80°C until analysis.
6. Samples were thawed at room temperature, and thoroughly mixed.
7. Calibration standards in blank mouse plasma were prepared via serial dilution from a concentration of 5000 nM to a concentration of 1.00 nM using a dilution pattern of 1:2.5:2:2. The actual range of the calibration curve would be tailored to the concentration observed in the samples at the time of analysis.
8. A volume of 50  $\mu$ L of freshly thawed and mixed brain homogenate blank, calibration standard, or sample was transferred to a microcentrifuge tube.
9. Add 200  $\mu$ L methanol to each microcentrifuge tube.
10. Vortex for 2 minutes.
11. Centrifuge tubes for 2 minutes at 14000 rpm in a microcentrifuge.

12. Transfer 100  $\mu$ L of the supernatant to a 96 well plate for analysis.
13. Inject 10  $\mu$ L for LC/MS/MS analysis.

### LC/MS/MS Conditions

Agilent 6460 mass spectrometer

Source

Gas temperature: 350°C

Gas flow: 11 L/min

Nebulizer: 45 psi

Sheath gas temperature: 400°C

Sheath gas flow: 11 L/min

Capillary: 4000V

Nozzle voltage: 500V

### MS/MS Detection

Dwell time: 50 ms

| Compound        | Transition  | Fragmentor | Collision Energy | Retention Time | Ion Mode |
|-----------------|-------------|------------|------------------|----------------|----------|
| <b>FP200041</b> | 693.3→113.0 | 125        | 19               | 3.90           | negative |
| <b>7</b>        | 711.3→113.0 | 130        | 27               | 4.43           | negative |

### LC Conditions

Agilent 1200

Agilent XDB C18 2.0 x 150 mm 5  $\mu$

Column temperature: 30°C

A: 10 mM ammonium formate pH 4

B: methanol

Flow rate: 0.50 mL/min

| Time | %A | %B |
|------|----|----|
| 0.00 | 95 | 5  |
| 2.00 | 95 | 5  |
| 3.00 | 5  | 95 |
| 4.50 | 5  | 95 |
| 4.60 | 95 | 5  |
| 5.50 | 95 | 5  |

**Table 1S.** Individual concentration results in mouse plasma subsequent to IV dosing at 13.9 mg/kg

| <b>Time (min)</b> | <b>Dose Route</b> | <b>Concentration of FP200041 (nM)</b> | <b>Concentration of 7 (nM)</b> |
|-------------------|-------------------|---------------------------------------|--------------------------------|
| 5                 | IV                | BLOQ (< 10.0 nM)                      | BLOQ (< 10.0 nM)               |
| 5                 | IV                | 109                                   | 28.2                           |
| 5                 | IV                | 80.6                                  | 265                            |
| 5                 | IV                | 182                                   | 131                            |
| 15                | IV                | 64.8                                  | 106                            |
| 15                | IV                | 53.6                                  | 231                            |
| 15                | IV                | BLOQ (< 10.0 nM)                      | BLOQ (< 10.0 nM)               |
| 15                | IV                | 85.6                                  | 100                            |
| 30                | IV                | BLOQ (< 10.0 nM)                      | 59.1                           |
| 30                | IV                | 94.5                                  | 104                            |
| 30                | IV                | BLOQ (< 10.0 nM)                      | 34.3                           |
| 30                | IV                | BLOQ (< 10.0 nM)                      | 31.4                           |
| 60                | IV                | BLOQ (< 10.0 nM)                      | 30.5                           |
| 60                | IV                | BLOQ (< 10.0 nM)                      | 24.5                           |
| 60                | IV                | BLOQ (< 10.0 nM)                      | 42.0                           |
| 60                | IV                | BLOQ (< 10.0 nM)                      | 36.6                           |
| 90                | IV                | BLOQ (< 10.0 nM)                      | BLOQ (< 10.0 nM)               |
| 90                | IV                | BLOQ (< 10.0 nM)                      | 13.5                           |
| 90                | IV                | BLOQ (< 10.0 nM)                      | 16.8                           |
| 90                | IV                | BLOQ (< 10.0 nM)                      | BLOQ (< 10.0 nM)               |
| 120               | IV                | BLOQ (< 10.0 nM)                      | BLOQ (< 10.0 nM)               |
| 120               | IV                | BLOQ (< 10.0 nM)                      | BLOQ (< 10.0 nM)               |
| 120               | IV                | BLOQ (< 10.0 nM)                      | BLOQ (< 10.0 nM)               |
| 120               | IV                | BLOQ (< 10.0 nM)                      | BLOQ (< 10.0 nM)               |

**Figure 4S.** Concentrations of FP200041 (left side) and peptide 7 (right side) in mouse plasma subsequent to IV dosing at 13.9 mg/kg (conc  $\pm$  SEM).

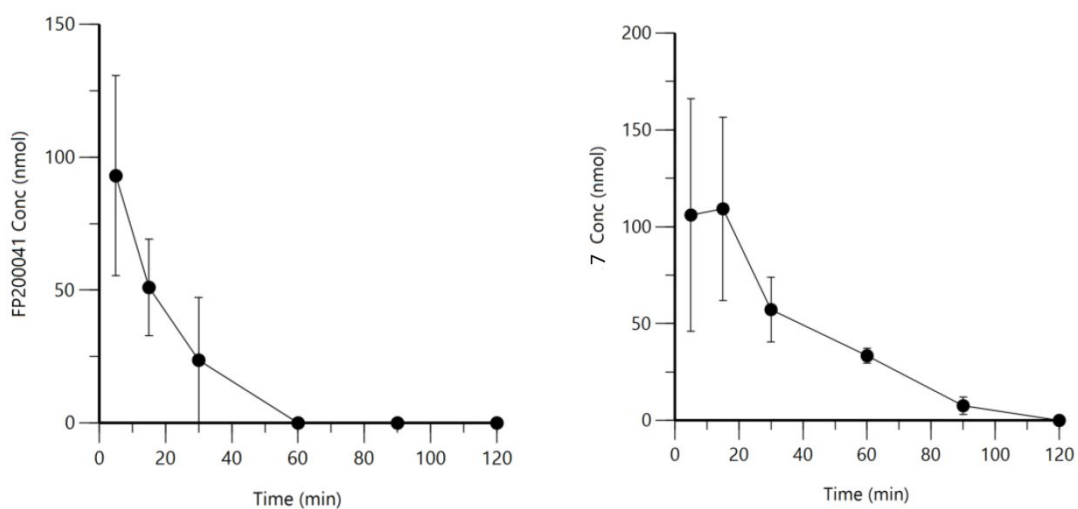

There was a large variability in the concentrations for each plasma time point, as demonstrated by SEM. This variability can be due to several reasons, most likely to variation in dosing (dose delivery) and or sample collection across animals. Additionally, variability can be introduced if the compounds are relatively insoluble in the dosing formulation.
